1 ***Running head***

2 TESTING THE RED QUEEN AND COURT JESTER

3

4 ***Title***

5 **Testing the role of the Red Queen and Court Jester as drivers of the**  
6 **macroevolution of Apollo butterflies**

7

8 ***Authors***

9 FABIEN L. CONDAMINE<sup>1,2,3\*</sup>, JONATHAN ROLLAND<sup>4</sup>, SEBASTIAN HÖHNA<sup>5</sup>, FELIX A. H.  
10 SPERLING<sup>3†</sup> AND ISABEL SANMARTÍN<sup>2†</sup>

11

12 ***Authors' addresses***

13 <sup>1</sup> *CNRS, UMR 5554 Institut des Sciences de l'Evolution (Université de Montpellier | CNRS*  
14 *| IRD | EPHE), Montpellier, France;*

15 <sup>2</sup> *Department of Biodiversity and Conservation, Real Jardín Botánico, CSIC, Plaza de*  
16 *Murillo, 2; 28014 Madrid, Spain;*

17 <sup>3</sup> *Department of Biological Sciences, University of Alberta, Edmonton T6G 2E9, AB, Canada;*

18 <sup>4</sup> *Department of Ecology and Evolution, University of Lausanne, 1015 Lausanne, Switzerland;*

19 <sup>5</sup> *Division of Evolutionary Biology, Ludwig-Maximilian-Universität München, Grosshaderner*  
20 *Strasse 2, Planegg-Martinsried 82152, Germany*

21

22 † Co-senior authors.

23 ***Corresponding author*** (\*): Fabien L. Condamine, CNRS, UMR 5554 Institut des Sciences de  
24 l'Evolution (Université de Montpellier), Place Eugène Bataillon, 34095 Montpellier, France.

25 Phone: +336 749 322 96 | E-mail: [fabien.condamine@gmail.com](mailto:fabien.condamine@gmail.com)

26 **Abstract.** – In macroevolution, the Red Queen (RQ) model posits that biodiversity dynamics  
27 depend mainly on species-intrinsic biotic factors such as interactions among species or life-  
28 history traits, while the Court Jester (CJ) model states that extrinsic environmental abiotic  
29 factors have a stronger role. Until recently, a lack of relevant methodological approaches has  
30 prevented the unraveling of contributions from these two types of factors to the evolutionary  
31 history of a lineage. Here we take advantage of the rapid development of new macroevolution  
32 models that tie diversification rates to changes in paleoenvironmental (extrinsic) and/or biotic  
33 (intrinsic) factors. We inferred a robust and fully-sampled species-level phylogeny, as well as  
34 divergence times and ancestral geographic ranges, and related these to the radiation of Apollo  
35 butterflies (Parnassiinae) using both extant (molecular) and extinct (fossil/morphological)  
36 evidence. We tested whether their diversification dynamics are better explained by a RQ or  
37 CJ hypothesis, by assessing whether speciation and extinction were mediated by diversity-  
38 dependence (niche filling) and clade-dependent host-plant association (RQ) or by large-scale  
39 continuous changes in extrinsic factors such as climate or geology (CJ). For the RQ  
40 hypothesis, we found significant differences in speciation rates associated with different host-  
41 plants but detected no sign of diversity-dependence. For CJ, the role of Himalayan-Tibetan  
42 building was substantial for biogeography but not a driver of high speciation, while positive  
43 dependence between warm climate and speciation/extinction was supported by continuously  
44 varying maximum-likelihood models. We find that rather than a single factor, the joint effect  
45 of multiple factors (biogeography, species traits, environmental drivers, and mass extinction)  
46 is responsible for current diversity patterns, and that the same factor might act differently  
47 across clades, emphasizing the notion of opportunity. This study confirms the importance of  
48 the confluence of several factors rather than single explanations in modeling diversification  
49 within lineages.

50

51 *[Diversification; extinction; Himalayan orogeny; historical biogeography; host-plant shifts;*  
52 *integrative study; mountain building; Papilionidae; past climate change; speciation]*

53 **INTRODUCTION**

54 Evolutionary biologists have long endeavored to determine which factors govern  
55 biodiversity dynamics, aiming to answer questions such as why some clades have diversified  
56 more than others, or why some lineages are widely distributed whereas others survive in  
57 restricted ranges (Ezard et al. 2016). Two different mechanistic macroevolutionary models  
58 have been proposed to explain the generation and maintenance of diversity. The Red Queen  
59 (RQ) model (Van Valen 1973), which stems from Darwin and Wallace, posits that  
60 diversification is driven by species-intrinsic, biotic factors such as interactions among species,  
61 species ecology, or life-history traits. The Court Jester (CJ) model, which builds on  
62 paleontological evidence (Barnosky 2001), argues that diversification dynamics result from  
63 historical abiotic forces such as abrupt changes in climate or geological tectonic events that  
64 drive speciation and extinction rates, usually acting clade-wide across lineages.

65 The CJ and RQ models are generally considered the two extremes of a continuum,  
66 operating over different geographic and temporal scales. Biotic factors such as species  
67 interactions shape ecosystems locally over short time spans, whereas abiotic factors such as  
68 climate and tectonic events shape large-scale patterns regionally and globally over millions of  
69 years (Benton 2009). However, biotic interactions can also be observed at large spatial and  
70 temporal scales (Liow et al. 2015; Silvestro et al. 2015), while Van Valen's (1973) original  
71 RQ hypothesis is now interpreted as accepting the role of a changing environment in shaping  
72 species evolution (Voje et al. 2015).

73 Although both abiotic (environmental) and biotic (species-intrinsic) drivers are  
74 recognized as fundamental for regulating biodiversity (Ezard et al. 2011), these two types of  
75 factors are often studied in isolation (Drummond et al. 2012a; Bouchenak-Khelladi et al.  
76 2015; Lagomarsino et al. 2016), searching for correlations between shifts in diversification  
77 rates and the evolution of key innovations or the appearance of key opportunities (Maddison

78 et al. 2007; Alfaro et al. 2009; Rabosky 2014; Givnish et al. 2015). However, often no single  
79 factor but a confluence of biotic and abiotic factors is responsible for the diversification rate  
80 shift (Donoghue and Sanderson, 2015), and there could be an interaction effect. For example,  
81 C<sub>4</sub> grasses appeared in the Eocene but their expansion and explosive diversification started  
82 only after mid-Miocene aridification in Africa and Central Asia (Edwards et al. 2010).

83 Statistical assessment of the relative contributions of abiotic and biotic factors  
84 underlying diversity patterns has been made possible by the development of new probabilistic  
85 models in the field of diversification dynamics (Stadler 2013; Morlon 2014; Höhna 2015).  
86 One type of model estimates diversification rates that are clade-dependent and identifies  
87 differences in diversification rates among clades that can be explained by key innovations  
88 (Alfaro et al. 2009; Morlon et al. 2011; Rabosky et al. 2013), or by diversity-dependence and  
89 niche filling (i.e. diversification decreasing as the number of species increases, Rabosky and  
90 Lovette 2008; Etienne et al. 2012). A second type of model aims to detect statistical  
91 associations between diversification rates and changes in species traits (trait-dependent  
92 diversification models, Maddison et al. 2007; Ng and Smith 2014), or between geographic  
93 evolution and diversification, such as a change in continental connectivity allowing the  
94 colonization of a new region and a subsequent increase in allopatric speciation (Goldberg et  
95 al. 2011). A third type of model assumes continuous variation in diversification rates over  
96 time that depends on a paleoenvironmental variable and investigates whether diversification  
97 rates can be affected by abiotic environmental changes (e.g. paleotemperature, Condamine et  
98 al. 2013). Finally, episodic birth-death models search for tree-wide rate shifts that act  
99 concurrently across all lineages in a tree, for example a mass extinction event removing a  
100 fraction of lineages at a certain time in the past (Stadler 2011; Höhna 2015; May et al. 2016).

101 The first two types of models have been used to test RQ-like hypotheses on the effect  
102 of biotic interactions, while the other models are often used in the context of the CJ

103 hypothesis (environmental change). Studies using a subset of these models to address both  
104 abiotic and biotic factors are becoming more frequent, but are often used at a local or regional  
105 geographic scale (Schnitzler et al. 2011; Drummond et al. 2012a; Jónsson et al. 2012; Hutter  
106 et al. 2013; Bouchenak-Khelladi et al. 2015; Lagomarsino et al. 2016), and limited  
107 temporally. No study so far has addressed the full set of models using a large (geographic)  
108 and long (temporal) scale within the same lineage. Such a study would have substantial power  
109 to provide information on questions such as why some lineages diversify and others do not,  
110 and the extent that diversification is attributable to trait evolution and/or ecological  
111 opportunity (Wagner et al. 2012). It might also shed light on the current debate about whether  
112 biodiversity is at an equilibrium bounded by ecological limits (Rabosky 2013), although it is  
113 unclear how relevant such limits are compared to other biological explanations (Moen and  
114 Morlon 2014). Alternatively, diversity might be unbounded and controlled by rare but drastic  
115 environmental changes such as climatic mass extinction events (Antonelli and Sanmartín  
116 2011; Meredith et al. 2011; Kergoat et al. 2014; Condamine et al. 2015a; May et al. 2016).

117 A key to such a study would be to find a group that: *(i)* has experienced both biotic  
118 and abiotic pressures at different temporal and spatial scales; *(ii)* shows large species diversity  
119 and high specialization; and *(iii)* has good information available about its taxonomic and  
120 evolutionary history. Nearly complete taxon sampling is crucial for accurate estimation of  
121 diversification rates (Cusimano and Renner 2010; Brock et al. 2011; Höhna et al. 2011; Davis  
122 et al. 2013), whereas rich fossil evidence is important for divergence time estimation and  
123 accurate reconstruction of biogeographic history (Meseguer et al. 2015). Phytophagous  
124 insects are especially good models because they present complex biotic (trophic) interactions  
125 with their host plants (Ehrlich and Raven 1964), and many of these lineages are old enough to  
126 have experienced dramatic past climatic changes.

127 Here, we address the role of biotic (RQ) and abiotic (CJ) factors that drive patterns of  
128 species richness in Apollo butterflies (Papilionidae: Parnassiinae). The Parnassiinae comprise  
129 eight genera and over 70 species (Ackery 1975; Weiss 1991-2005; Kocman 2009), grouped  
130 into three tribes – Luehdorfiini, Zerynthiini, and Parnassiini (Nazari et al. 2007). Apollo  
131 butterflies occur from the Western Palearctic to the Western Nearctic (Weiss 1991-2005).  
132 Most diversity is concentrated in the Palearctic, where we find two non-monophyletic  
133 lowland-flying communities separated by the Himalaya and Tibetan Plateau (HTP, **Figure 1**):  
134 an Eastern Palearctic group formed by *Luehdorfia* (Luehdorfiini) and *Bhutanitis* and *Sericinus*  
135 (Zerynthiini), and a Western Palearctic community including *Archon* (Luehdorfiini),  
136 *Allancastria* and *Zerynthia* (Zerynthiini), and *Hypermnestra* (Parnassiini). The largest genus,  
137 *Parnassius*, is mainly distributed in mountainous regions across the Holarctic, with its highest  
138 diversity in the HTP (Weiss 1991-2005; Kocman 2009; Nazari et al. 2007; Michel et al.  
139 2008). Compared to the species-poor genera *Allancastria*, *Archon*, *Bhutanitis*, *Hypermnestra*,  
140 *Luehdorfia* and *Sericinus* (each with five species maximum), the 50+ species of *Parnassius*  
141 have been suggested as an example of rapid diversification. This unbalanced species richness,  
142 together with their disjunct pattern of distribution in the Himalayan region, suggests that the  
143 HTP orogeny might have been an important driver in the biogeographic and diversification  
144 history of Parnassiinae.

145

146 **Figure 1. Distribution and species richness patterns of Apollo butterflies.** Map shows the  
147 current separation of west and east communities of Parnassiinae, divided by the Himalayan-  
148 Tibetan Plateau. Lower portion of figure compares the current species diversity of each  
149 biogeographical unit (which may be non-monophyletic) or genus. Images of Parnassiinae  
150 (also in subsequent figures) are created by Fabien Condamine.

151

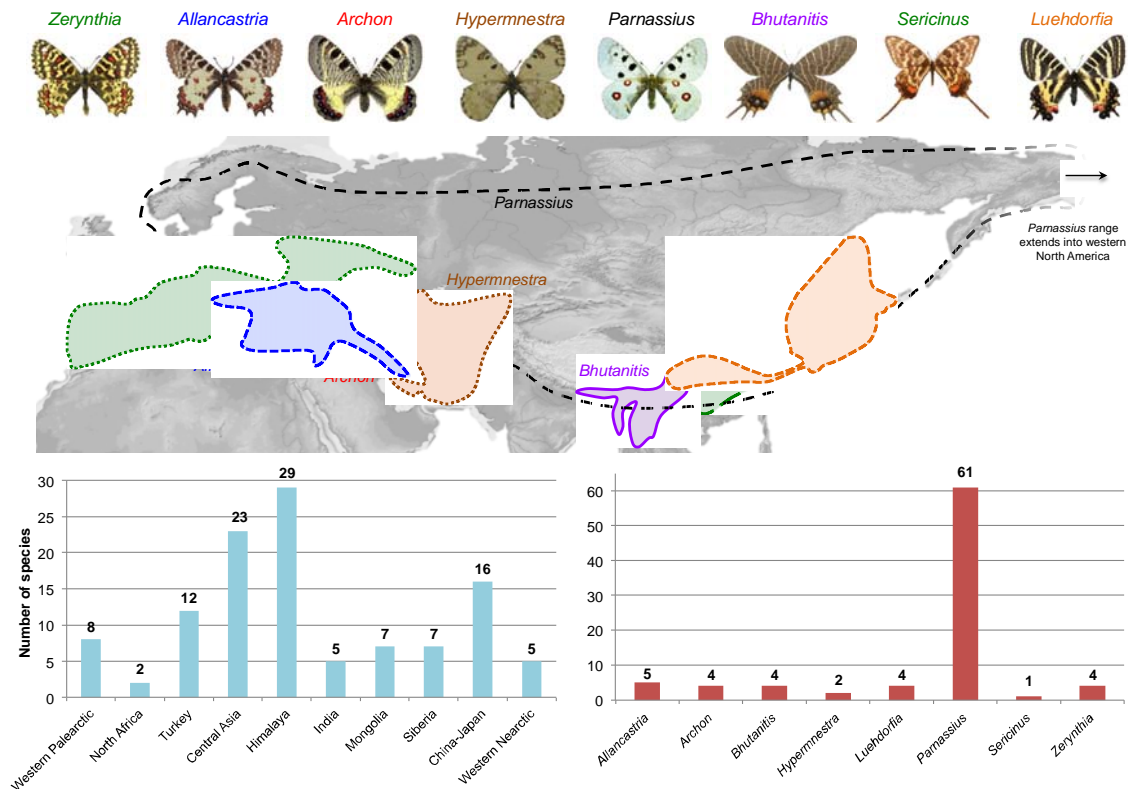

152

153 Parnassiinae are also remarkable for their (nearly) strict but diverse host-plant  
 154 specialization (Ehrlich and Raven 1964). Tribes Luehdorfiini and Zerynthiini feed on  
 155 Aristolochiaceae, the ancestral host of Parnassiinae (Condamine et al. 2012). Within  
 156 Parnassiini, *Hypermnestra* feeds on Zygophyllaceae, while *Parnassius* has experienced two  
 157 host-plant shifts, toward Crassulaceae+Saxifragaceae and Papaveraceae (Michel et al. 2008;  
 158 Condamine et al. 2012), and is regarded as an adaptive radiation (Rebourg et al. 2006).  
 159 Finally, Apollo butterflies constitute a model to understand the role of past environmental  
 160 change in lineage diversification. Phylogeographic studies pinpointed the effect of Pleistocene  
 161 glaciations on population-level dynamics (e.g. Keyghobadi et al. 2005; Gratton et al. 2008;  
 162 Schoville and Roderick 2009; Dapporto 2010; Todisco et al. 2010, 2012; Zinetti et al. 2013).  
 163 Time-calibrated phylogenies support an origin of the subfamily in the Early Cenozoic  
 164 (Condamine et al. 2012), which means that the lineage has experienced the dramatic cooling  
 165 and warming events of the last 50 Ma, including a drop in global temperatures at the end of

166 the Eocene (Eocene-Oligocene climate transition, EOCT, Liu et al. 2009) that led to the  
167 demise of Boreotropical Holarctic vegetation (Pound et al. 2012).

168 In this study, we reconstruct a completely sampled phylogeny of Parnassiinae to  
169 explore the role played by abiotic (CJ) and biotic (RQ) factors, isolated or in unison, in the  
170 origin and fate of biological radiations, including paleotemperature, mountain orogeny, host  
171 specialization, range expansion and diversity dependence with niche filling. If interactions  
172 among species are the dominant drivers of evolution, diversification rates are expected to  
173 show diversity-dependent dynamics or be dependent on ecological traits. For example, one  
174 might expect diversification rates to decrease as a function of diversity or increase with  
175 ecological opportunity. Conversely, if evolution is driven mainly by changes in the physical  
176 environment, clade-wide responses due to abrupt abiotic perturbations should dominate  
177 macroevolutionary dynamics, e.g. diversification rates may shift following major climatic  
178 changes that extirpated certain lineages while favoring the radiation of others. We test these  
179 hypotheses using trait-dependent, time-dependent, environment-dependent and episodic birth-  
180 death models and compare the fit (explanatory power) of these models using maximum  
181 likelihood and Bayesian inference. Our study is the first to address the CJ and RQ hypotheses  
182 at such a large scale, and to compare the performance of these models within a single  
183 inference framework.

184

## 185 **MATERIALS AND METHODS**

### 186 *Taxon sampling and molecular dataset*

187 The latest effort to resolve phylogenetic relationships in Parnassiinae was Condamine  
188 et al. (2012), but that study did not include all species. For our study, DNA sequences were  
189 obtained from GenBank using *Taxonomy* browser searches (full dataset is provided in the  
190 Supplementary Material that accompanies this article available on Dryad at



191 [http://dx.doi.org/10.5061/dryad.\[NNNN\]](http://dx.doi.org/10.5061/dryad.[NNNN]), **Appendix 1**). Sequences of less than 250  
192 nucleotides (possibly microsatellites) and genes sequenced in very few specimens were not  
193 included. Overall the dataset comprises >1,800 sequences, representing 69 species and five  
194 genes (four mitochondrial and one nuclear) including 730 sequences for cytochrome oxidase I  
195 (COI), 214 for NADH dehydrogenase 1 (ND1), 147 for NADH dehydrogenase 5 (ND5), 202  
196 for rRNA 16S (16S), and 115 for elongation factor 1 alpha (EF-1 $\alpha$ ). This large molecular  
197 dataset comprises all sequences generated by previous studies on Parnassiinae, especially by  
198 F.L.C. and F.A.H.S. (Omoto et al. 2004, 2009; Katoh et al. 2005; Nazari et al. 2007; Nazari  
199 and Sperling 2007; Michel et al. 2008; Condamine et al. 2012), and includes all currently  
200 described species within the family, except for *Bhutanitis ludlowi* (Möhn 2005; Weiss 2005;  
201 Churkin 2006). The dataset also includes the majority of described subspecies or geographic  
202 races (Nazari and Sperling 2007; Gratton et al. 2008; Schoville and Roderick 2009; Dapporto  
203 2010; Todisco et al. 2010, 2012; Zinetti et al. 2013). Additionally, sequences of nine species  
204 of swallowtails were added to the dataset as outgroups, with *Baronia brevicornis* considered  
205 as the sister group to all remaining Papilionidae, and two species for each of the four tribes  
206 included within Papilioninae, the sister subfamily of Parnassiinae (Condamine et al. 2012).

207 Sequences were aligned using MAFFT 7.110 (Katoh and Standley 2013) with default  
208 settings (E-INS-i algorithm). Reading frames of coding genes were checked in Mesquite 3.03  
209 ([www.mesquite.org](http://www.mesquite.org)). Datasets (species/subspecies names and GenBank accession numbers)  
210 are available on Dryad (**Appendices 1 and 2**).

211

### 212 *Assessment of fossil positions and calibrations*

213 Constraints on clade ages were enforced through fossil calibrations, whose systematic  
214 position was assessed using phylogenetic analyses (Donoghue et al. 1989; Sauquet et al.  
215 2012). Phylogenetic analyses of the dataset included both living and fossil taxa and

216 incorporated both morphological and molecular data using a total-evidence approach  
217 (Ronquist et al. 2012a).

218 Swallowtail fossils are scarce, but two unambiguously belong to Parnassiinae (Nazari  
219 et al. 2007). The first is †*Thaites ruminiana* (Scudder 1875), a compression fossil from  
220 limestone in the Niveau du gypse d'Aix Formation of France (Bouches-du-Rhone, Aix-en-  
221 Provence) within the Chattian (23.03-28.1 Ma) of the late Oligocene (Rasnitsyn and  
222 Zherikhin 2002; Sohn et al. 2012). The second is †*Doritites bosniaskii* (Rebel 1898), an  
223 exoskeleton and compression fossil from Italy (Tuscany) from the Messinian (5.33-7.25 Ma,  
224 late Miocene, Sohn et al. 2012). Absolute ages of geological formations were taken from  
225 Gradstein et al. (2012).

226 To assess the phylogenetic positions of fossils, our morphological dataset comprised  
227 236 characters (Hiura 1980; Nazari et al. 2007) including adult external (160) and internal  
228 (54) morphology, egg (2) and larval (10) morphology, pupal morphology (5), and characters  
229 for pigment color and chromosome number (5). Morphological characters were coded for all  
230 extant species in each genus except *Parnassius* (only eight species: one per subgenus). Yet,  
231 *Parnassius* had little impact on our analyses since there are no fossils related to this genus  
232 (Nazari et al. 2007). Fossils were only coded for adult external morphology.

233 Morphological and molecular data were combined to construct a total-evidence  
234 phylogeny using MrBayes 3.2.6 (Ronquist et al. 2012b). Morphological data were modeled  
235 using the Mk model (Lewis 2001). The best-fitting partitioning scheme for the molecular data  
236 was selected with PartitionFinder 1.1.1 (Lanfear et al. 2012), using the *greedy* search  
237 algorithm and the Bayesian Information Criterion (BIC). Rather than using a single  
238 substitution model per molecular partition, we sampled across the entire substitution rate  
239 model space (Huelsenbeck et al. 2004) using the reversible-jump Markov Chain Monte Carlo  
240 (rj-MCMC) option. Two independent analyses with one cold and seven heated chains each

241 were run for 20 million generations, sampled every 2000<sup>th</sup>. A 50% majority rule consensus  
242 tree was built after discarding 25% samples as burn-in. The dataset used for this analysis is  
243 available on Dryad (**Appendix 3**).

244

#### 245 *Phylogeny and estimates of divergence times*

246 We examined whether the rate of molecular evolution evolved in a clock-like pattern  
247 using PATHd8 (Britton et al. 2007). Since the hypothesis of a strict molecular clock was  
248 rejected for 68 of the 92 nodes ( $P < 0.05$ ), we estimated divergence times using Bayesian  
249 relaxed-clock methods accounting for rate variation across lineages (Drummond et al. 2006).  
250 MCMC analyses implemented in BEAST 1.8.2 (Drummond et al. 2012b) were employed to  
251 approximate the posterior distribution of rates and divergences times and infer their credibility  
252 intervals. We set the following settings and priors: a partitioned dataset (after the best-fitting  
253 PartitionFinder scheme) was analyzed using the uncorrelated lognormal distribution (UCLD)  
254 clock model, with the mean set to a uniform prior between 0 and 1, and an exponential prior  
255 ( $\lambda = 0.333$ ) for the standard deviation. The branching process prior was set to either a  
256 Yule or a birth-death (Gernhard 2008) process (since tree priors may impact estimates of  
257 molecular dating, Condamine et al. 2015b), using the following uniform priors: the Yule birth  
258 rate and birth-death mean growth rate ranged between 0 and 10 with a starting value at 0.1,  
259 and the birth-death relative death rate ranged between 0 and 1 (starting value=0.5).

260 Calibration priors employed the fossil constraints indicated above (see Results for the  
261 phylogenetic positions), using a uniform prior with the minimum age equal to the youngest  
262 age of the geological formation where the fossil was found. Additionally, we constrained the  
263 crown of Papilionidae with a uniform distribution bounded by a minimum age of 47.8 Ma  
264 (Smith et al. 2003; Gradstein et al. 2012) based on two fossils †*Praepapilio colorado* and †*P.*  
265 *gracilis* (Durdan and Rose 1978), both from the Lutetian (mid-Eocene) of the Green River

266 Formation (USA, Colorado). We could not place these fossils phylogenetically because of  
267 limited taxon sampling for Papilioninae. Instead, we placed these unambiguous fossils  
268 conservatively at the crown of the family as they share synapomorphies with all extant  
269 subfamilies (de Jong 2007), and have proven to be reliable calibration points for the crown  
270 group (Condamine et al. 2012). All uniform calibration priors were set with an upper bound  
271 equal to the estimated age of angiosperms (~140 Ma, *sensu* Magallón et al. 2015), which is  
272 six times older than the oldest Parnassiinae fossil. This upper age is intentionally set as  
273 ancient to allow exploration of potentially old ages for the clade. Since the fossil record of  
274 Lepidoptera is highly incomplete and biased (Sohn et al. 2015), caution is needed in using the  
275 few recent fossil calibrations.

276 To explore the impact of sampled diversity, tree prior, and morphological data on  
277 BEAST inferences, we ran four analyses as follows: (i) molecular data only and Yule model;  
278 (ii) molecular data only and birth-death process; (iii) molecular and morphological data (total-  
279 evidence analysis) and Yule model; and (iv) molecular and morphological data (total-  
280 evidence analysis) and birth-death process, with all other parameters set equal. The total-  
281 evidence analyses provide a completely sampled phylogeny of Parnassiinae due to the  
282 inclusion of *Bhutanitis ludlowi* (only available with morphological data).

283 Each MCMC analysis was run for 100 million generations, sampled every 10,000<sup>th</sup>,  
284 resulting in 10,000 samples in the posterior distribution of which the first 2,500 samples were  
285 discarded as burn-in. All analyses were performed on the computer cluster CIPRES Science  
286 Gateway (Miller et al. 2015), using BEAGLE (Ayres et al. 2012). Convergence and  
287 performance of MCMC runs were evaluated using Tracer 1.6 (Rambaut and Drummond  
288 2009) and the effective sample size (ESS) criterion for each parameter. A maximum-clade  
289 credibility (MCC) tree was reconstructed, with median age and 95% height posterior density  
290 (HPD). Bayes factor (BF) comparisons using stepping-stone sampling (Xie et al. 2011),

291 which allows unbiased approximation of the marginal likelihood of Bayesian analyses (Baele  
292 et al. 2013), was used to select among competing models. We considered  $2\ln\text{BF}$  values  $>10$  to  
293 significantly favor one model over another (Kass and Raftery 1995). The dataset and BEAST  
294 xml files generated for this study are available on Dryad (**Appendix 4**).

295

## 296 *Historical biogeography*

297 Definition of biogeographic units was based on the present-day distribution of species  
298 but also informed by plate tectonics (Sanmartín et al. 2001) and alpine orogeny  
299 reconstructions (Bouilhol et al. 2013). Ten areas were defined: WN=Western North America  
300 (including the Rocky Mountains); WP=Europe (France, Spain, Pyrenees, Alps, Italy, Greece,  
301 Crete, Balkans, Scandinavia, Western Russian, and Ural Mountains); SI=Eastern Russia,  
302 Siberia, and Kamchatka; CA=Central Asia (Turkmenistan, Uzbekistan and Kazakhstan);  
303 MO=Mongolian steppes and Altai Mountains; TU=Turkey, Caucasian region, Syria, Iraq,  
304 Iranian Plateau and Zagros Mountains; HTP=Himalaya, Tibetan Plateau, and Pamir region;  
305 IN=India, Bhutan, Yunnan, and Southern China; CJ=Northern China, Korea, and Japan;  
306 AF=North Africa and Arabia.

307 Species ranges were defined by presence–absence in each region (**Appendix 5**).  
308 Biogeographic analyses were performed on the MCC tree (outgroups removed), using the  
309 Dispersal–Extinction–Cladogenesis model of range evolution (DEC; Ree and Smith 2008)  
310 implemented in the R-package *BioGeoBEARS* 0.2.1 (Matzke 2014). Because of concerns with  
311 statistical validity and model choice in *BioGeoBEARS* (Ree and Sanmartín in review), we did  
312 not use the DEC+J model (Matzke 2014). We also preferred DEC to DEC+J because the  
313 latter often infers null or extremely low extinction rates (Sanmartín and Meseguer 2016), an  
314 effect of the model favoring direct dispersal over widespread ranges, which might not be  
315 adequate for reconstructing the history of ancient groups. Biogeographic ranges larger than

316 four areas in size were disallowed as valid biogeographic states if they were not subsets of the  
317 terminal species ranges; widespread ranges comprising areas that have never been  
318 geographically connected (Sanmartín et al. 2001) were also removed. We constructed a time-  
319 stratified model (**Appendix 6** on Dryad) with four time slices that specified constraints on  
320 area connections and spanned the Parnassiinae evolutionary history; each interval represents a  
321 geological period bounded by major changes in tectonic and climatic conditions thought to  
322 have affected the distribution of these butterflies.

323

#### 324 *Testing the Red Queen and Court Jester hypotheses*

325 To understand the relative contributions of RQ versus CJ -type factors, we ran a series  
326 of macroevolutionary models using both maximum likelihood (ML) and Bayesian inference  
327 (BI). Rather than on a single tree, analyses were performed on a sample of trees from the  
328 BEAST post-burnin posterior distribution (with outgroups removed); an exception was the  
329 diversity-dependent diversification models that, due to time constraints, were run only on the  
330 MCC tree. This approach allowed us to assess the robustness of results to phylogenetic  
331 uncertainty and estimate confidence intervals for the parameter estimates. We compared the  
332 fit of each model to the data using the corrected Akaike Information Criterion (AICc) for the  
333 ML analyses, and Bayes Factor comparisons (2lnBF) for BI.

334

335 *Diversification analyses in a Red Queen model.* – We first tested the hypothesis that  
336 diversity is bounded or at equilibrium, meaning that diversity expanded rapidly in early  
337 diversification, filled most niches and saturated toward the present. We explored the effect of  
338 diversity-dependence on speciation and extinction rates using the method of Etienne et al.  
339 (2012) implemented in the R-package *DDD* 2.7. We applied five different models: (i)  
340 speciation depends linearly on diversity without extinction, (ii) speciation depends linearly on

341 diversity with extinction, (iii) speciation depends exponentially on diversity with extinction,  
342 (iv) speciation does not depend on diversity and extinction depends linearly on diversity, and  
343 (v) speciation does not depend on diversity and extinction depends exponentially on diversity.  
344 For each model, the initial carrying capacity was set to the current number of described  
345 species.

346 We also tested the effect of host-plant association on diversification rates, since  
347 previous study has pointed to a potential correlation between shifts in diversification and host-  
348 plant switches (Ehrlich and Raven 1964). We used a diversification model of the state-  
349 dependent speciation and extinction (SSE) family of models, in which extinction and  
350 speciation rates are associated with phenotypic evolution of a trait along a phylogeny  
351 (Maddison et al. 2007). In particular, we used the Multiple State Speciation Extinction model  
352 (MuSSE; FitzJohn et al. 2009) implemented in the R-package *diversitree* 0.9-7 (FitzJohn  
353 2012), which allows for multiple character states. Larval host plant data were taken from  
354 previous work (Ehrlich and Raven 1964; Scriber 1984; Collins and Morris 1985; Tyler et al.  
355 1994; Scriber et al. 1995). The following four character states were used: (1)  
356 Aristolochiaceae; (2) Zygophyllaceae; (3) Papaveraceae; and (4) Crassulaceae+Saxifragaceae.  
357 Data at a lower taxonomic level than plant family were not used because of the great number  
358 of multiple associations exhibited by genera that could alter the phylogenetic signal. Thirty-  
359 six different models were run to test whether speciation, extinction, or transition rates were  
360 dependent on trait evolution. Models were built with increasing complexity, starting from a  
361 model with no difference in speciation, extinction and transition rates (3 parameters) to the  
362 most complex model with different speciation, extinction, and transition rates for each  
363 character state (20 parameters). We estimated posterior density distribution with Bayesian  
364 MCMC analyses (10,000 steps) performed with the best-fitting models and resulting  
365 speciation, extinction and transition rates.

366           There have been concerns about the power of SSE models to infer diversification  
367 dynamics from a distribution of species traits (Davis et al. 2013; Maddison and FitzJohn  
368 2015; Rabosky and Goldberg 2015). First, SSE models tend to have a high type I error bias  
369 related to the shape (topology) of the inferred tree (Rabosky and Goldberg 2015). To test  
370 whether our diversification results were potentially biased, we estimated the difference of fit  
371 ( $\Delta$ AIC) between the best model from MuSSE and a null model (corresponding to the model  
372 with no difference in speciation, extinction and transition rates between the states of a  
373 character) and compared this with the difference between the same models as estimated from  
374 simulated datasets. 1000 sets of traits were generated on the Parnassiinae phylogeny using the  
375 *sim.history* function from the R-package *phytools* (Revell 2012). To keep the phylogenetic  
376 signal in the trait, transition rates between states were simulated using values obtained from  
377 the null model fitted on the observed phylogeny.

378           Second, there is concern whether SSE models are uncovering actual drivers of  
379 diversification, or whether they are simply pointing to more complex patterns involving  
380 unmeasured and co-distributed factors in the phylogeny (Beaulieu and O’Meara 2016). A  
381 model with an additional hidden character may alleviate this issue. We applied the Hidden  
382 SSE (HiSSE) model to specifically account for the presence of unmeasured factors that could  
383 impact diversification rates estimated for the states of any observed trait. The analyses were  
384 performed in the Bayesian software RevBayes (Höhna et al. 2016a).

385           To provide an independent assessment of the relationship between diversification rates  
386 and host specificity, we used models that allow diversification rates to vary among clades.  
387 BAMM 2.5 (Rabosky et al. 2013, 2014a) was used to explore for differential diversification  
388 dynamic regimes among clades differing in their host-plant feeding. BAMM analyses were  
389 run for 10 million generations, sampling every 10,000<sup>th</sup> and with four different values of the  
390 compound Poisson prior (CPP) to ensure the posterior is independent of the prior (Moore et



391 al. 2016). Mixing and convergence among runs (ESS>200 after 15% burn-in) were assessed  
392 with the R-package *BAMMtools* 2.1 (Rabosky et al. 2014b). BAMM has been criticized for  
393 incorrectly modeling rate-shifts on extinct lineages, i.e. unobserved (extinct or unsampled)  
394 lineages inherit the ancestral diversification process and cannot experience subsequent  
395 diversification-rate shifts (Moore et al. 2016, but see Rabosky et al. 2017). To solve this, we  
396 used here a novel approach implemented in RevBayes that models rate shifts consistently on  
397 extinct lineages by using the SSE framework (Moore et al. 2016; Höhna et al. in prep.).  
398 Although there is no information of rate shifts for unobserved/extinct lineages in a phylogeny  
399 including extant species only, these types of events must be accounted for in computing the  
400 likelihood. The number of rate categories is fixed in the analysis but RevBayes allows any  
401 number to be specified, thus allowing direct comparison of different macroevolutionary  
402 regimes.

403

404 *Diversification analyses in a Court Jester model.* – We evaluated the impact of abiotic  
405 factors such as abrupt changes in tectonic or climatic settings or mass extinction events (e.g.  
406 the EOCT at 33.9 Ma) using episodic birth-death models implemented in the R-packages  
407 *TreePar* 3.3 (Stadler 2011) and *TESS* 2.1 (CoMET model, Höhna et al. 2016b; May et al.  
408 2016). These models allow detection of discrete changes in speciation and extinction rates  
409 concurrently affecting all lineages in a tree. Both approaches estimate changes in  
410 diversification rates at discrete points in time, but can also infer mass extinction events,  
411 modeled as sampling events in the past in which the extant diversity is reduced by a fraction.  
412 Speciation and extinction rates can change at those points but remain constant within time  
413 intervals. The underlying likelihood function is identical in the two methods (Stadler 2011;  
414 Höhna 2015), but *TreePar* and *TESS* differ in the inference framework (ML vs. BI) and the  
415 method used for model comparison (AICc vs. BF). In addition, *TESS* uses independent CPPs

416 to simultaneously detect mass extinction events and discrete changes in speciation and  
417 extinction rates, while TreePar estimates the magnitude and timing of speciation and  
418 extinction changes independently to the occurrence of mass extinctions (i.e. the three  
419 parameters cannot be estimated simultaneously due to parameter identifiability issues, Stadler,  
420 2011). To compare inferences between CoMET and TreePar, we performed two independent  
421 TreePar analyses allowing and disallowing mass extinction events (argument  
422 ME=TRUE/FALSE). We compared models with 0, 1 or 2 rate shifts/mass extinction events in  
423 TreePar using the AICc, while BF comparisons were used to assess model fit between models  
424 with varying number and time of changes in speciation/extinction rates and mass extinctions  
425 in TESS. Finally, we used an implementation of CoMET in RevBayes (Höhna, unpublished),  
426 an episodic birth-death model in which speciation and extinction are allowed to vary at  
427 discrete points in time, but are autocorrelated (instead of independent/uncorrelated as in  
428 CoMET) across time intervals; a Brownian model with rates in the next time interval centered  
429 around the rates in the current time interval was used. Also, the number of diversification rate  
430 shifts was set *a priori* as in population skyline models (Strimmer and Pybus 2001), while in  
431 CoMET this is modeled through a CPP prior.

432 To examine the influence of elevational distribution (lowland, mountain, or both) on  
433 speciation and extinction rates, we used the trait-dependent diversification model GeoSSE  
434 (Geographic State Speciation and Extinction, Goldberg et al. 2011). Geographic characters  
435 require a third widespread state, because, unlike morphological traits, ancestors can be present  
436 in more than one state (area). This requires the modeling of cladogenetic state change, the  
437 probability associated with the division of an ancestral range between the two descendants,  
438 alongside anagenetic state change (i.e. the probability of character change along branches).  
439 Species were coded by their elevation zone, using data from literature, museum records, and  
440 field observations. We evaluated 12 models of increasing complexity to test the relationship

441 between elevational distributions and diversification. As in MuSSE above, we evaluated the  
442 performance of GeoSSE using simulation tests. Trait simulation was more complex here  
443 because there is no direct transition between states A and B. Instead, these transitions involve  
444 range expansion to an intermediate widespread state AB (dAB, dBA) followed by local  
445 extinction (xA, xB). Following Goldberg et al. (2011), we considered transition rates between  
446 A to B as null because they involve more than one instantaneous event; the transition rate  
447 from A to AB was coded as range expansion dA, from B to AB as dB; transitions from AB to  
448 A and from AB to B (“extirpation rates”) were coded as xB and xA, respectively. For our  
449 1000 simulations, we used the transition rates of the model with equal speciation rates  
450 ( $s_A=s_B=s_{AB}$ ), but different extinction ( $x_A \neq x_B$ ) and transition rates ( $d_A \neq d_B$ ).

451 Finally, we tested the impact of paleoenvironmental variables on diversification rates,  
452 using a birth-death likelihood method in which rates may change continuously with an  
453 environmental variable, itself varying through time (Condamine et al. 2013). We tested four  
454 models: (i) a constant-rate birth-death model in which diversification is not associated to the  
455 environmental variable; (ii) speciation rate varies according to environment and extinction  
456 rate does not vary; (iii) speciation rate does not vary and extinction rate varies according to  
457 environment; and (iv) both speciation and extinction rates vary according to environment. We  
458 also tested the corresponding models in which speciation and/or extinction are allowed to  
459 vary with time, but independently from the environmental variable (time-dependent birth-  
460 death models, Morlon et al. 2011). When rates varied with the environment (E), we assumed  
461 exponential variation, such that  $\lambda(E) = \lambda_0 \times e^{\alpha E}$  and  $\mu(E) = \mu_0 \times e^{\beta E}$ , in which  $\lambda_0$  and  $\mu_0$   
462 are the speciation and extinction rates for a given environmental variable for which the value  
463 is 0, and  $\alpha$  and  $\beta$  are the rates of change according to the environment. Positive values for  $\alpha$  or  
464  $\beta$  mean a positive effect of the environment on speciation or extinction (and conversely). As  
465 environmental variables (**Figure 2**), we used paleotemperature (data retrieved from Zachos et

466 al. 2008) and paleo-elevation of the HTP (a proxy for mountain building), with data compiled  
467 from existing data in the literature available on Dryad (**Appendix 7**). The R-package *pspline*  
468 was used to build environmental vectors from the data as input for the birth-death models.

469 Alternatively, we used RevBayes and the CoMET framework (episodic birth-death  
470 models) to implement an analysis in which diversification rates are allowed to co-vary with,  
471 or evolve independently from, paleotemperatures and paleo-elevation across discrete time  
472 intervals (Palazzesi al. in review). A correlation coefficient, denoted  $\beta$ , is co-estimated with  
473 diversification rates in the model and describes the magnitude and direction of the  
474 relationship between the variable and changes in diversification rates:  $\beta < 0$  (negative  
475 correlation),  $\beta > 0$  (positive correlation), and  $\beta = 0$  (no correlation, in which case the model  
476 collapses to the episodic birth-death models; see **Appendix 8** on Dryad).

477

478 **Figure 2. Environmental changes over the last 40 million years.** a) Trends in global  
479 climate change estimated from relative proportions of different oxygen isotopes (Zachos et al.  
480 2008), and b) trends in Himalayan-Tibetan Plateau (HTP) elevation for the last 40 Myrs,  
481 compiled from data from a literature survey; our compilation shows that the HTP was as high  
482 as 3000 m in the Eocene, congruent with recent reviews (Renner 2016; Appendix 7). c) Map  
483 of the current elevation of the Himalayan-Tibetan Plateau with the species diversity of  
484 *Parnassius* in the region.

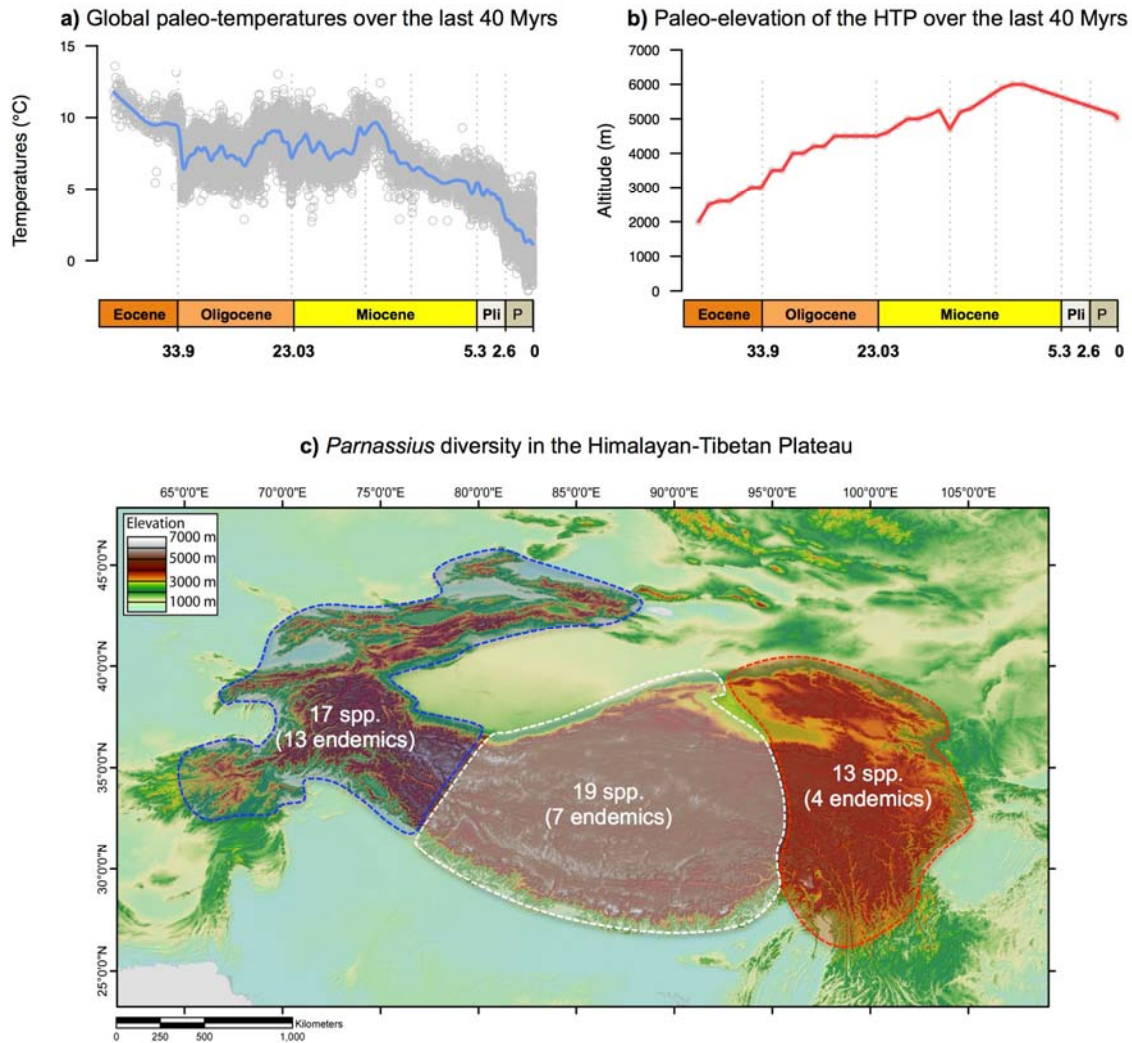

485

## 486 Results

### 487 *Phylogeny and fossil placements*

488 The molecular matrix comprised 4535 nucleotides and 85 extant species of Parnassiinae plus  
489 two fossil species, following recent taxonomic reviews (Frankenbach et al. 2012; Bollino and  
490 Racheli 2012) (**Appendices 1 and 2** on Dryad). PartitionFinder selected eight partitions as the  
491 best scheme for substitution models (**Appendix 9** on Dryad). Convergence among runs was  
492 supported by the low average standard deviation of split frequencies, PSRF values  $\approx 1.0$ , and  
493 ESS  $\gg 1000$  for many parameters. The resulting Bayesian trees were well resolved and robust:  
494 74.4% of the nodes were recovered with PP  $> 0.95$  with MrBayes (**Figure 3**), and 83% in

495 BEAST (70% with PP=1) when fossil taxa were removed. Phylogenetic relationships agree  
496 with previous studies (Nazari et al. 2007; Michel et al. 2008), showing  
497 Luehdorfiini+Zerynthiini as sister-tribes and sister to Parnassiini; within the latter,  
498 *Hypermnestra* is sister to the genus *Parnassius*. Most of the weak support is found within the  
499 radiation of species complexes, such as *Parnassius apollo* or in the subgenus *Kailasius*, but  
500 two basal nodes in *Parnassius* have PP<0.9.

501 The total-evidence analysis allowed us to test the phylogenetic placement of the  
502 Parnassiinae fossils. †*Thaites* was often recovered as sister to Parnassiini (PP=0.6, **Figure 3**),  
503 and occasionally as sister to Luehdorfiini+Zerynthiini. This fossil was used to provide a  
504 minimum age for crown Parnassiinae, calibrated with a uniform prior bounded between 23.03  
505 Ma (minimum) and 47.8 Ma (maximum). †*Doritites* was reconstructed as sister to *Archon*  
506 (Luehdorfiini, PP=0.96), in agreement with Carpenter (1992), who tentatively synonymized  
507 †*Doritites* with *Luehdorfia*. The crown of Luehdorfiini was thus constrained for divergence  
508 time estimation using a uniform distribution bounded between 5.33 Ma (minimum) and 47.8  
509 Ma (maximum).

510

511 **Figure 3. Phylogenetic relationships inferred with a Bayesian total-evidence approach**  
512 **combining molecular and morphological data of extant and extinct Parnassiinae.** This  
513 integrative approach allowed assessment of the phylogenetic placement of two fossils, which  
514 were then used to calibrate the molecular dating analysis. Backbone nodes show posterior  
515 probability values. Nodal support values within genera or subclades are shown in Appendix  
516 10 for alternative dating analyses including, or not, morphological data.

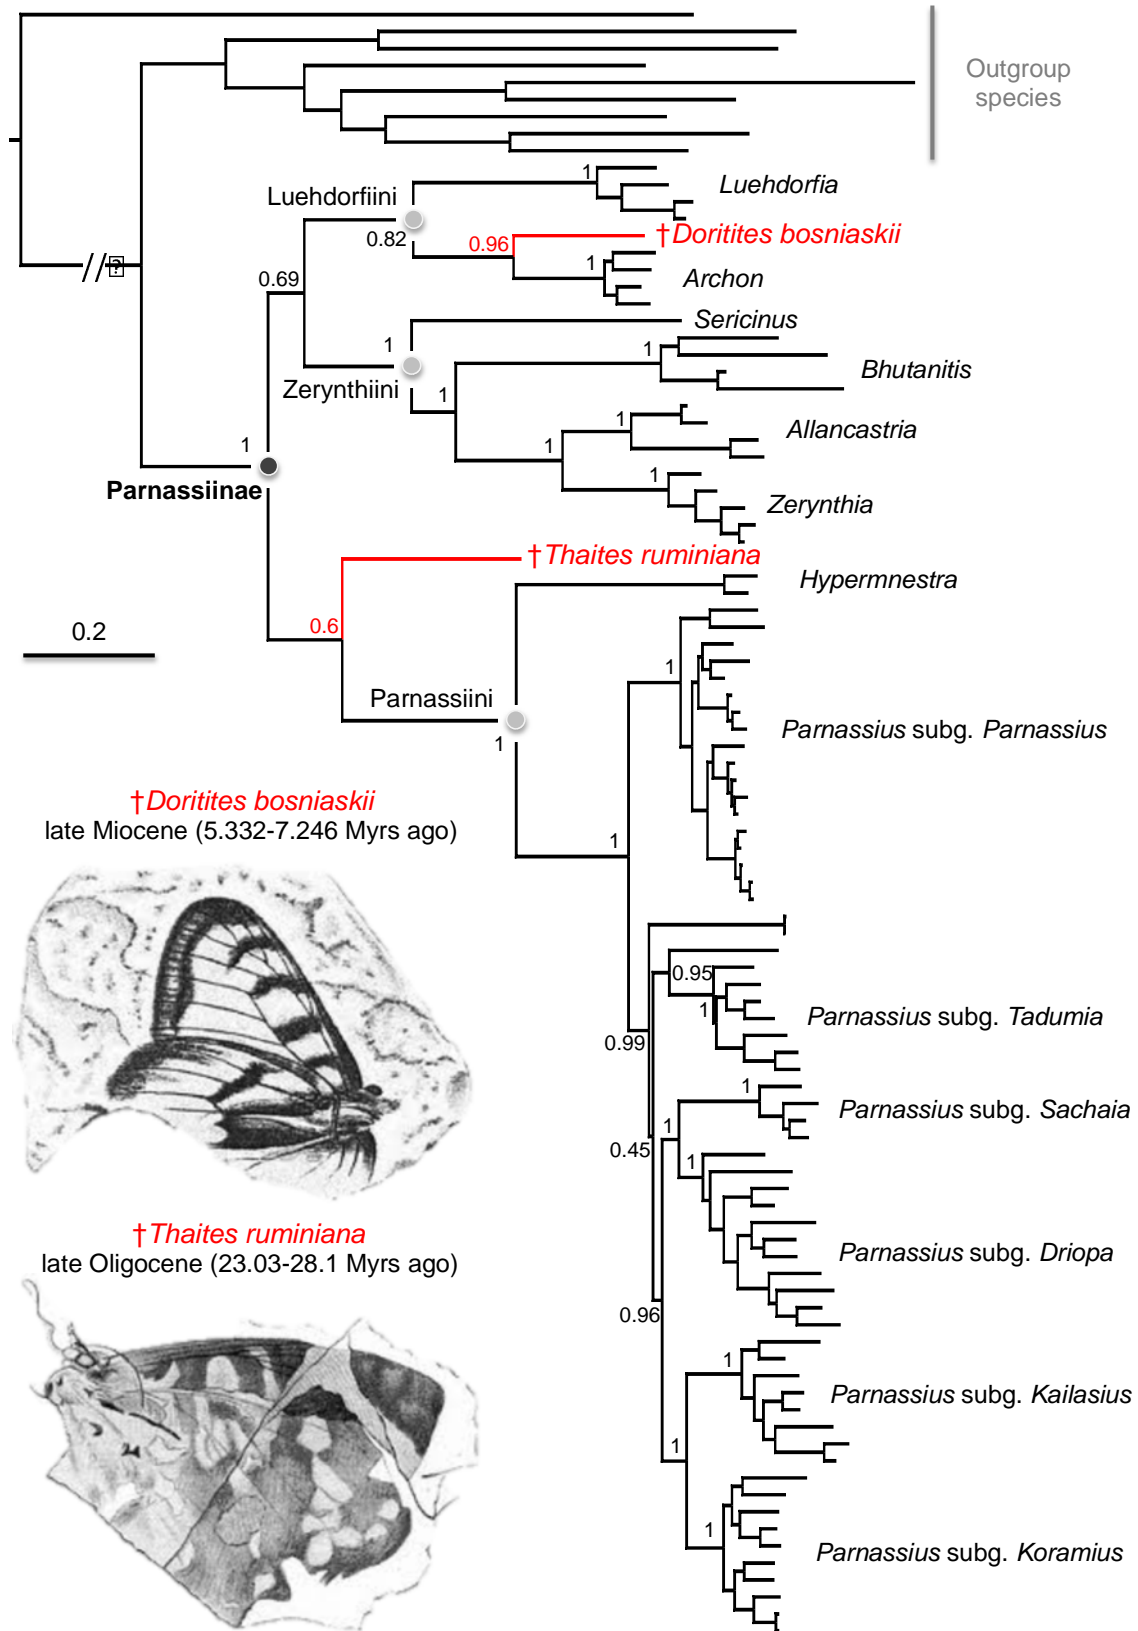

518

519 *Divergence time and biogeographic estimates*

520 The BEAST analyses (Yule vs. birth-death, molecular vs. total-evidence) yielded  
521 almost identical estimates of divergence times with less than one million years of difference  
522 for most nodes (**Appendix 10** on Dryad). Bayes Factor comparisons were also not conclusive,  
523 with little difference in the stepping-stone marginal likelihood estimate among analyses  
524 (**Appendix 11** on Dryad). We present the results for the analysis with the birth-death prior  
525 and the total-evidence dataset (**Figure 4**) because it offered slightly better convergence and  
526 incorporating extinction into the tree prior seemed more realistic for such an old lineage  
527 (results from the other analyses are available on Dryad, **Appendix 10**).

528 Based on this analysis and results from the DEC inference, Parnassiinae originated in  
529 the late Eocene (38.6 Ma, 95% HPD 31.4-46.6 Ma) in Central Asia (**Figure 4**). The ancestor  
530 of sister-tribes Luehdorfiini and Zerynthiini (36.7 Ma, 29.9-44.5 Ma) is also reconstructed in  
531 Central Asia, followed by independent dispersal events to India + Caucasus-Turkey and the  
532 HTP. Luehdorfiini diversified in the early Miocene at 23.3 Ma (17.4-30.2 Ma) within a broad  
533 geographic range including India, Turkey-Caucasus, and Central Asia; this was followed by  
534 extinction in Central Asia and India, and a later dispersal to China-Japan along the stem of  
535 *Luehdorfia*. Zerynthiini originated in the Oligocene (30.3 Ma, 24.1-37.2 Ma) within a region  
536 comprising India, Turkey-Caucasus, Central Asia, and the HTP, and also underwent  
537 extinction events in Central Asia and India during the Miocene. In contrast, Parnassiini first  
538 diversified within this region in the early Miocene (22.6 Ma, 17.2-28.5 Ma), followed by  
539 dispersal to Turkey-Caucasus in *Hypermnestra*. The ancestor of *Parnassius* dispersed from  
540 Central Asia to HTP around the mid-Miocene (13.4 Ma, 10.5-16.6 Ma), followed by  
541 vicariance between subgenus *Parnassius* and the ancestor of the other subgenera. Dispersal  
542 events to adjacent geographic regions and subsequent allopatric speciation are reconstructed



543 within each subgenus, especially in *Driopa*. A more detailed account of the biogeographic  
544 history and alternative nodal reconstructions are available on Dryad (**Appendix 12**).

545

546 **Figure 4. Time-calibrated phylogeny and biogeography of Apollo butterfly radiation**  
547 **and paleo-tectonic evolution at important periods.** Colored squares on nodes indicate the  
548 most likely biogeographical estimate, as in the lower left inset (uncertainties in range  
549 estimates are in Appendix 12). Triangles indicate range expansions, and X's denote local  
550 extinctions. A timescale spans the full evolutionary history of the group. Earth maps represent  
551 paleogeography at specific time periods. The red box highlights a notable period of local  
552 extinctions in the clade Luehdorfiini+Zerynthiini. Panels at bottom represent the main  
553 Cenozoic environmental changes occurring with the onset and rise of the Himalayan-Tibetan  
554 Plateau (HTP) or floristic turnovers. Sensitivity analyses were conducted to test the effect of  
555 adding or excluding morphological data; results are presented in Appendix 10. Plio., Pliocene;  
556 Ple., Pleistocene.

557

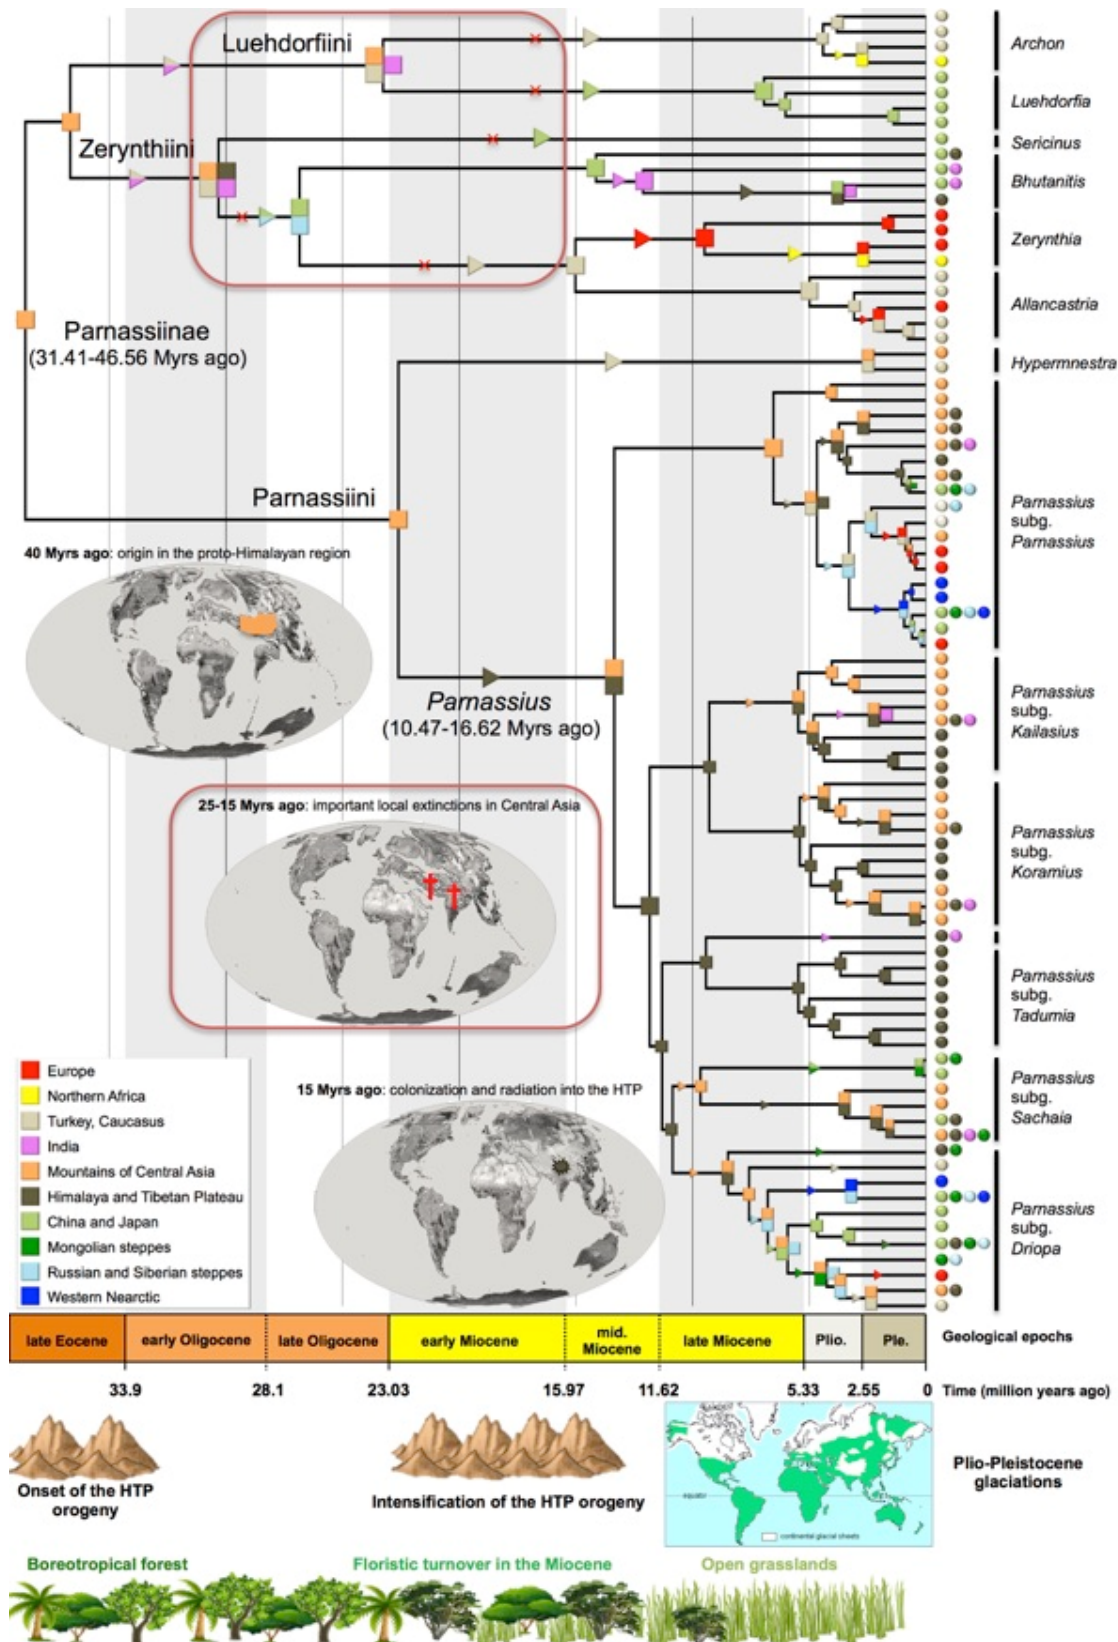

559 **Macroevolutionary dynamics**

560 A summary of diversification rate analysis results is presented in **Table 1**.

561 *Diversification in a Red Queen model.* – Diversity-dependent diversification models  
562 estimated an unlimited carrying capacity for the subfamily (**Appendix 13** on Dryad),  
563 implying that accumulating diversity did not influence diversification rates. The best-fitting  
564 DDD model was one in which extinction rate increased with diversity. For *Parnassius* the  
565 best model was a diversity-dependence process with speciation decreasing with increasing  
566 diversity. However, none of these models received significant support when compared to  
567 other models ( $\Delta AICc < 2$ ).

568 MuSSE analyses on host-plant preferences selected a model in which speciation rates  
569 varied among clades feeding on different host plants; extinction and transition rates were  
570 estimated as equal (**Appendix 14** on Dryad). Zygophyllaceae feeders (*Hypermnestra*) had the  
571 lowest speciation rate, followed by Aristolochiaceae feeders (Luehdorfiini and Zerynthiini),  
572 with the highest rates for clades feeding on Papaveraceae (all *Parnassius* except subgenus  
573 *Parnassius*) and Crassulaceae+Saxifragaceae (subgenus *Parnassius*) (**Figure 5**). MCMC  
574 credibility intervals showed significant differences between the speciation rates of  
575 Papaveraceae feeders and Crassulaceae+Saxifragaceae feeders and those feeding on other  
576 host plants ([http://dx.doi.org/10.5061/dryad.\[NNNN\]](http://dx.doi.org/10.5061/dryad.[NNNN]), **Appendix 15**). Transition rates for  
577 host-plant switches were often estimated close to zero with strong niche conservatism in the  
578 phylogeny; once a lineage shifted to a new host it did not switch back and only rarely  
579 colonized another host plant (**Appendix 14**). We assessed the robustness of this pattern with a  
580 simulation procedure, and Bayesian implementations of HiSSE and MuSSE in RevBayes  
581 ([http://dx.doi.org/10.5061/dryad.\[NNNN\]](http://dx.doi.org/10.5061/dryad.[NNNN]), **Appendix 16**). All analyses supported the same  
582 diversification pattern with speciation rates being different among lineages feeding on

583 different host plants. Our estimates were robust to known biases of SSE models, suggesting a  
584 strong effect of host plant on diversification rates of Parnassiinae.

585

586 **Figure 5. Diversification of Parnassiinae linked to their host plant.** a) Phylogenetic  
587 distribution of host-plant traits (four states) analyzed with MuSSE diversification models. b)  
588 Bayesian inferences made with the best-fitting MuSSE model (see Appendix 14) showed that  
589 speciation rates vary according to the host-plant trait: *Parnassius* clades feeding on  
590 Papaveraceae and Crassulaceae+Saxifragaceae have higher speciation rates than their  
591 relatives feeding on other families; extinction and transition rates were estimated as equal  
592 across clades.

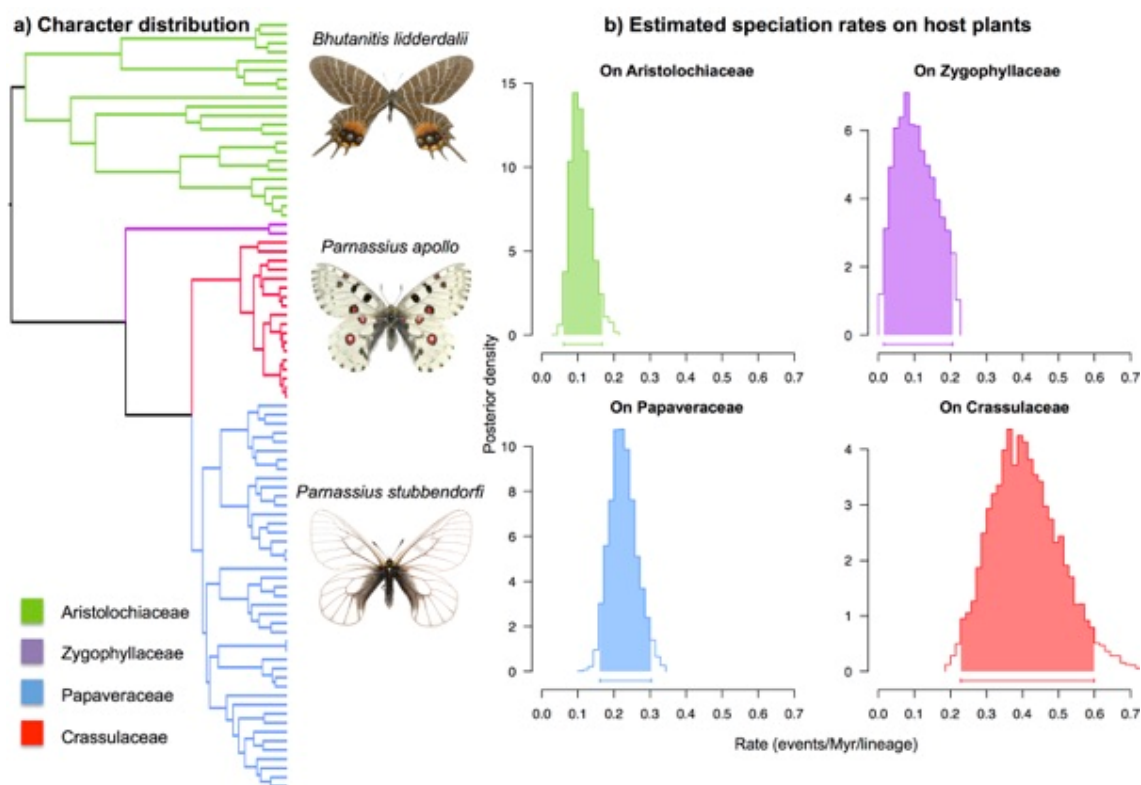

593

594 Bayesian inferences that model rate-heterogeneity across clades provided further  
595 corroboration of the SSE inferences (**Figure 6a**). Both BAMM and an alternative  
596 implementation of lineage-specific birth-death model in RevBayes supported a diversification

597 regime in which there is at least an increase in diversification rates along the stem of  
598 *Parnassius* (and possibly a second upshift at the stem of subgenus *Parnassius*) and found  
599 higher speciation rates for host-plant feeders on Crassulaceae+Saxifragaceae and  
600 Papaveraceae than those on Aristolochiaceae or Zygophyllaceae (**Appendices 17-19** on  
601 Dryad). BAMM was insensitive to the CPP prior.

602

603 **Figure 6. Diversification dynamics of Parnassiinae inferred with time-dependent models.**

604 a) Rate-heterogeneity-across-clades models implemented in BAMM and RevBayes identified  
605 one significant shift in diversification rates along the stem leading to *Parnassius* (represented  
606 by a red circle; see also Appendices 17-19), with a higher speciation rate in this clade than in  
607 the rest of the tree. Episodic birth-death models implemented in CoMET (b) and TreePar (c)  
608 identified a possible mass extinction event in the mid-Miocene (~15 Ma). The blue histogram  
609 shows the uncertainty in the timing of the mass extinction event based on the estimates over  
610 200 trees with TreePar (similar estimates are obtained for CoMET; Appendix 20). The two  
611 models also estimated an increase in diversity around the early-mid Pliocene (b,c), but this  
612 was followed by a decrease in diversity towards the present time in CoMET which was not  
613 detected in TreePar. The red line shows the lineages-through-time plot. The green lines  
614 represent the reconstructed past diversity before and after the mass extinction, based on the  
615 net diversification rates and 7.5% of survival probability estimated in TreePar. Plio., Pliocene;  
616 Ple., Pleistocene.

617

618

619

620

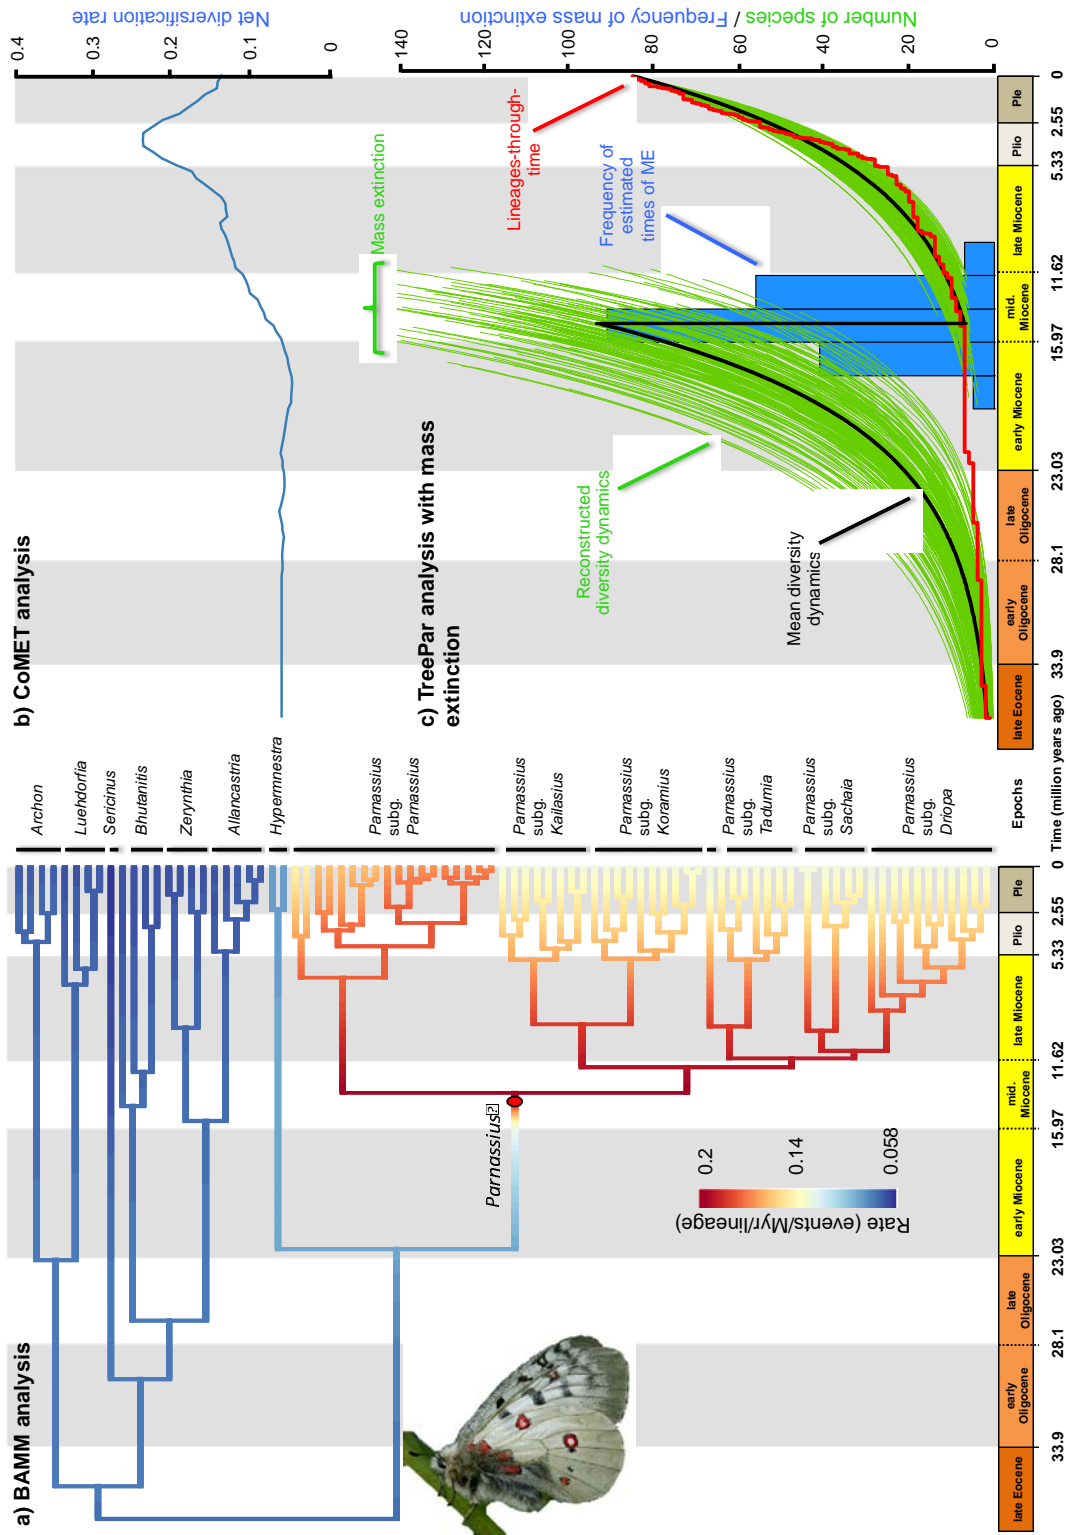

621 *Diversification in a Court Jester model.* – When mass extinctions are disallowed,  
622 TreePar supported a model with a single shift at 3.2 Ma (**Table 2**), with a low initial rate of  
623 diversification ( $r_2=0.031$ ) and high turnover ( $\epsilon_2=0.91$ ), followed by 4-fold increase in  
624 diversification rate ( $r_1=0.119$ ) and a joint decrease of turnover ( $\epsilon_1=0.17$ ). The second best  
625 model identified a second shift in the mid-Miocene (15.3 Ma) marked by an extinction period  
626 surrounded by low and negative values for the net diversification rate, and values  $>1$  for  
627 turnover. When mass extinctions are allowed to occur, TreePar favored a significant mass  
628 extinction at 14.8 Ma with an estimated survival probability after the mass extinction of 7.5%  
629 (**Table 2; Figure 6c**). The CoMET model implemented in RevBayes with the autocorrelated  
630 model also identified a mass extinction event in the mid-Miocene ~15 Ma ( $2\ln\text{BF}=6$ ,  
631 **Appendix 20** on Dryad). There was also a significant increase in speciation rates around the  
632 Pliocene, followed by a decrease in speciation towards the present (**Figure 6b**); similar results  
633 were obtained with the TESS implementation of CoMET (**Appendix 20**).

634 GeoSSE analyses selected a best-fitting model with equal dispersal and extinction  
635 rates between altitudinal regions (habitats), but higher speciation rates for highland regions  
636 compared to lowland regions (**Appendix 14** on Dryad). Allopatric speciation (for  
637 lowland/highland ancestors) was inferred to occur at a higher rate than within-lowland  
638 speciation, but at a lower rate than within-highland speciation; these differences remained  
639 significant in the Bayesian MCMC analyses, as the credibility interval did not overlap with  
640 zero (**Figure 7**). Nevertheless, the difference in speciation rates between higher and lower  
641 altitudes was not larger than expected by chance in our simulation tests (**Appendix 16** on  
642 Dryad), so we cannot reject the observed effect of altitude on speciation being affected by the  
643 shape of the phylogeny.

644

645 **Figure 7. Inference of geographic mode of speciation between mountain and lowland**  
646 **species.** a) The phylogenetic distribution of geographic traits (lowland, mountain or  
647 ‘widespread’) analyzed with GeoSSE models of diversification. b) Bayesian inferences made  
648 with the best-fitting GeoSSE model (selected over a series of 12 diversification models)  
649 showing that only speciation varies according to the geographic trait. The results indicate that  
650 the mountain-dwelling *Parnassiinae* species have significantly higher speciation rates than  
651 their counterparts. The allopatric (or biome divergence) speciation rate is also estimated to be  
652 elevated, congruent with our biogeographic estimates.

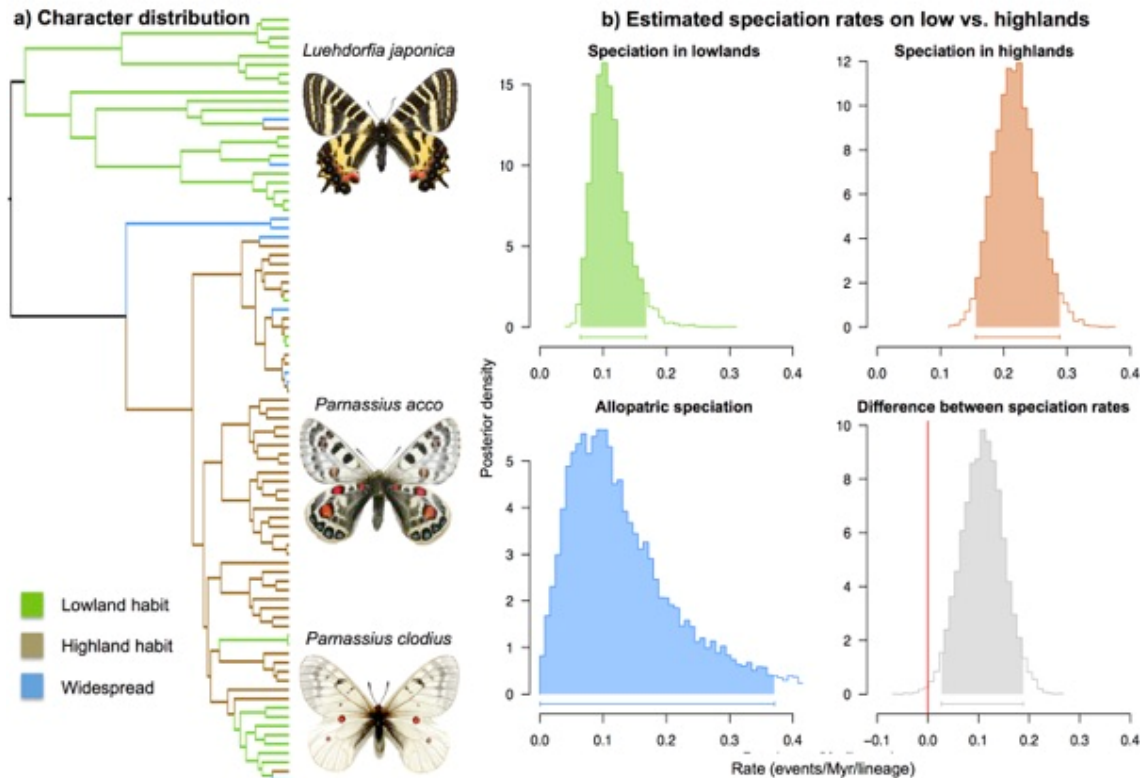

653

654 The ML-based paleoenvironment-dependent model implemented in RPANDA  
655 indicated positive dependence between diversification rates and past temperature (Table 3).  
656 In the best model, both speciation and extinction rates increased exponentially with  
657 temperature, with a general decrease in diversification rates toward the present, combined



658 with periods of high turnover rates in the late Oligocene and mid-Miocene (**Figure 8**). The  
659 best paleo-elevation model had speciation increasing with increasing altitude, whereas  
660 extinction remained constant (and not affected by elevation fluctuations), but this model does  
661 not fit better than constant-rate or temperature-dependent models (**Table 3**). In contrast, the  
662 Bayesian paleoenvironment-dependent model implemented in RevBayes indicated that both  
663 past temperature and elevation did not impact the diversification of Parnassiinae, since the  
664 correlation parameters  $\alpha$  and  $\beta$  had credibility intervals that were not significantly different  
665 from zero (**Appendix 21** on Dryad). Moreover, estimates with this model (**Figure 8**) showed  
666 diversification dynamics that were similar to those obtained with CoMET and TreePar, but  
667 unlike those from RPANDA. These differences might be attributed to the inference  
668 framework (ML in RPANDA vs. BI in RevBayes) or to the different underlying birth-death  
669 models (continuous in RPANDA vs. episodic in RevBayes). To test this, we implemented the  
670 continuous-paleoenvironmental models (Condamine et al. 2013) in TESS. We then compared  
671 these models against a constant birth-death model, episodic (piecewise constant) birth-death  
672 models (1 to 5 shifts), and time-variable models. This procedure ensured that a single  
673 statistical framework (ML and AIC) implemented in TESS was used to compare all models.  
674 Results showed that the best-fitting model was one in which speciation and extinction rates  
675 vary positively with paleotemperature, in agreement with RPANDA (**Table 4**). We therefore  
676 concluded that the different results are related not to the inference framework but to the  
677 underlying model: the use of an episodic birth-death model with autocorrelated rates across  
678 time intervals in the RevBayes model rather than the uncorrelated episodic model  
679 implemented in TESS.

680

681 **Figure 8. Paleoenvironment-dependent diversification processes in Apollo butterflies.**

682 ML continuous paleoenvironment-dependent models implemented in RPANDA (a-d) showed

683 positive dependence between paleotemperatures and speciation/extinction; the paleo-  
684 elevation-dependent diversification models did not fit the data better than the constant-rate or  
685 time-variable models. Bayesian inference of environment-dependent diversification with  
686 autocorrelated rates in RevBayes (e-h) supports a model in which both speciation and  
687 extinction are not dependent on temperature and elevation changes (represented by dotted  
688 lines, temperature and elevation values are given in Figure 2). Colored areas in speciation and  
689 extinction plots indicate the credibility interval, with the continuous line representing the  
690 median rate. Pli, Pliocene; and P, Pleistocene.

### ML continuous paleoenvironment-dependent diversification

a) Speciation depends positively on past temperatures

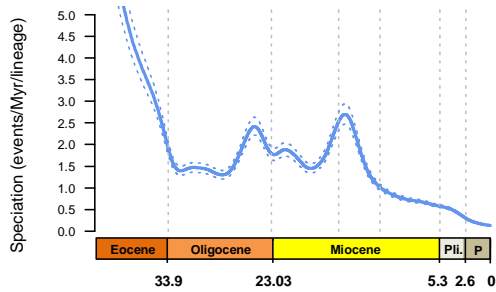

c) Speciation depends positively on past elevation

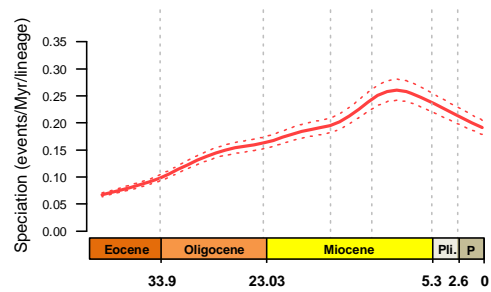

b) Extinction depends positively on past temperatures

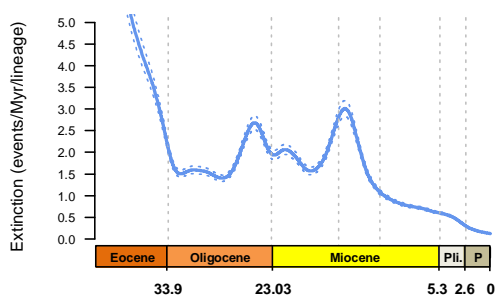

d) Extinction does not depend on past elevation

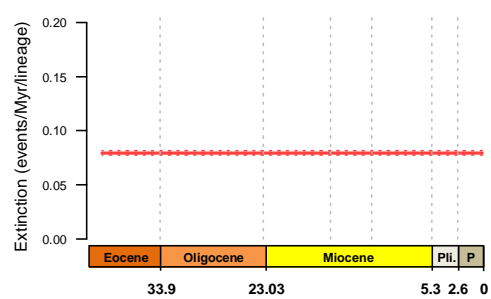

### Bayesian autocorrelated paleoenvironment-dependent diversification

e) Speciation does not depend on past temperatures

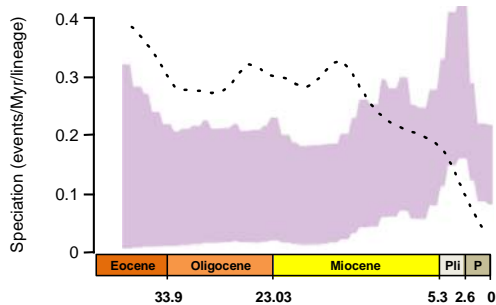

g) Speciation does not depend on past elevation

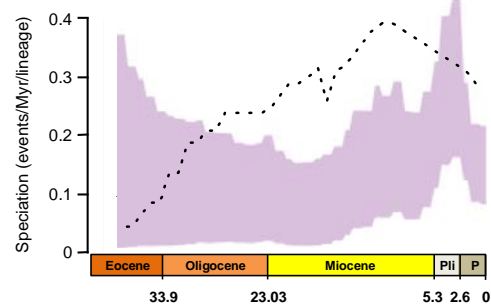

f) Extinction does not depend on past temperatures

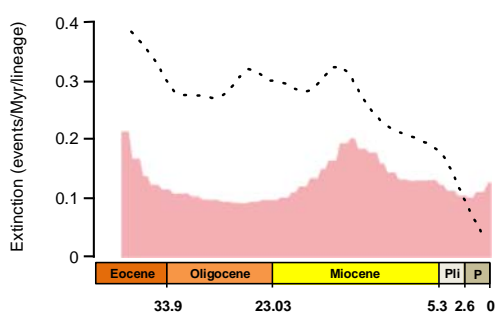

h) Extinction does not depend on past elevation

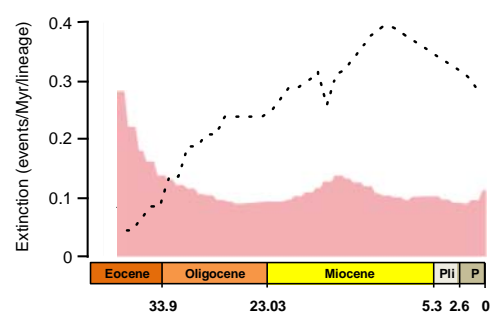

## 692 **Discussion**

693 Seeking the determinants of species richness is a fundamental aspect of biology (Morlon  
694 2014; Benton 2015). However, studies have generally focused on a single factor to explain a  
695 given diversity pattern, whether by historical events promoting changes in diversification and  
696 extinction (Barnosky 2001; Erwin 2009; Mayhew et al. 2008), or species ecology and clade  
697 competitions as the dominant drivers of diversification (Rabosky 2013; Silvestro et al. 2015).  
698 The combined influence of various factors has been tested less often (Drummond et al. 2012a;  
699 Bouchenak-Khelladi et al. 2015; Lagomarsino et al. 2016), and at a lower geographic and  
700 temporal scale or with a reduced set of methods. Further, these methods have mainly been  
701 implemented within a ML framework. In this study, we used existing and some novel  
702 methods under both ML and BI to evaluate potential factors driving diversification in  
703 Parnassiinae: some are related to a RQ mechanistic model of evolution, others to a CJ  
704 hypothesis.

705

### 706 *Coupled effect of mountain building and climate change*

707 A long-held tenet in biology is that environmental stability leads to greater species richness  
708 than a changing environment, suggesting that species interactions are a dominant force  
709 (Wallace 1878). A recent debate has emerged between those arguing that physically dynamic  
710 ecosystems play a major role in diversification (Hoorn et al. 2013; Condamine et al. 2015a)  
711 and even promote adaptive radiation (Tan et al. 2013), and those maintaining that landscape  
712 changes have not been important in diversification history, instead advocating the role of  
713 large-scale dispersal events as drivers of speciation (Smith et al. 2014). In the Northern  
714 Hemisphere, tectonic events such as the closure of Turgai Sea or the building of Alpine and  
715 Himalayan orogenies have caused large-scale landscape and climatic changes (Sanmartín et  
716 al. 2001). As a result many new habitats were formed that created potential ‘new ecological

717 spaces' and favored speciation (Xing and Ree 2017). Also, the newly created corridors  
718 stimulated species exchange between communities, while also acting as barriers that separated  
719 formerly continuous populations (Brikiatis 2014). Alternatively, landscape dynamics (i.e.  
720 unlike long-term stable environments) may have shattered former habitats, leading organisms  
721 to extinction. The rise of the HTP has often been invoked as providing important  
722 opportunities to diversify (Fjeldså et al. 2012; Price et al. 2014; Wen et al. 2014; Favre et al.  
723 2015; Hughes and Atchison 2015; Renner 2016), but its role as a driver has rarely been  
724 formally tested with diversification models (Xing and Ree 2017).

725         Our analyses detected higher *in-situ* speciation rates for mountain species than their  
726 lowland counterparts (with similar extinction rates), resulting in higher net diversification  
727 rates for mountain species. Yet, this pattern was not robust to phylogenetic shape artifacts  
728 (Rabosky and Goldberg 2015). Moreover, ML and BI-based paleo-elevation models found  
729 that an explicit link between diversification rates and periods of HTP uplift could be rejected  
730 in favor of a constant birth-death. These findings contrast with those of high-elevation taxa in  
731 the Andes reported to have diversified faster due to the rise of the Andes as compared to their  
732 low-elevation relatives (Lagomarsino et al. 2016; Pérez-Escobar et al. 2017). In contrast,  
733 clade rate-heterogeneous models (BAMM, RevBayes) and biogeographic analyses supported  
734 a link between diversification rates and the HTP orogeny within Parnassiini, particularly in  
735 *Parnassius*. A significant upshift in speciation rates was detected along the stem of  
736 *Parnassius*, coincident with the colonization of the HTP, while DEC inferred several  
737 speciation/vicariance events associated with the HTP orogeny (**Figure 4**). The latter is  
738 corroborated by the relatively high rate of allopatric (lowland/highland) speciation estimated  
739 by GeoSSE. These different results can partially be explained by the HTP rise providing  
740 novel, high-altitude habitats for colonization in *Parnassius*, and thereby promoting ecological  
741 divergence and initial rapid diversification (followed later by allopatric speciation). Yet,

742 diversification was not strictly parallel to periods of mountain building. Conversely, the rise  
743 of the HTP – and concomitant climatic changes such as regional cooling and aridification –  
744 led to higher extinction rates in non-mountain-adapted Parnassiinae lineages, such as  
745 Luehdorfiini and Zerynthiini that survived west and east of the Himalayan range; several  
746 events of extinction are inferred within these lineages around the mid-Miocene. This mixed  
747 effect is probably responsible for the lack of a significant association between orogeny and  
748 speciation in tree-wide models, which is otherwise detected by clade-heterogeneous models.

749 Paleoclimate change is another abiotic factor postulated to be a major trigger of  
750 diversification in terrestrial organisms (Erwin 2009). CoMET, TreePar, and the ML-based  
751 paleotemperature-dependent model inferred a pattern of increased turnover (background  
752 extinction) rates associated with periods of global climate warming, such as the mid-Miocene  
753 Climate Optimum (MMCO, 15-17 Ma, Böhme 2003) or the late Oligocene Warming Event  
754 (LOWE, ~25 Ma, Zachos et al. 2008, **Figure 2**). DEC also reconstructed several events of  
755 (geographic) extinction in Central Asia and India along the stem branches subtending the  
756 crown diversification of extant genera in Luehdorfiini and Zerynthiini (**Figure 4**). These long  
757 branches are consistent with periods of high extinction rates related to the LOWE, which were  
758 eventually followed by mid-Miocene radiations, especially in *Parnassius* (the latter probably  
759 linked to the HTP rise). Paleotemperature and the HTP orogeny probably had a joint influence  
760 in the diversification of Parnassiinae. Mountain building is known to be responsible for  
761 regional climate change (Sepulchre et al. 2006; Armijo et al. 2015), and for changes in  
762 biodiversity patterns, both directly as a geographic barrier and indirectly through climate  
763 change (Hoon et al. 2013). The HTP acted as a barrier to the influence of the Asian  
764 monsoons (Zhisheng et al. 2001) and induced considerable drying of Central Asia (Quade et  
765 al. 1989). In Parnassiinae, the HTP rise and subsequent periods of mountain building might  
766 have promoted diversification through the provision of “climate refugia”: locations where

767 taxa survived periods of regionally adverse climate. Although usually associated with  
768 maintaining biodiversity through glacial–interglacial climate changes (Gavin et al. 2014),  
769 mountains can provide climate refugia during warming-aridification events (Migliore et al.  
770 2013; Pokorny et al. 2015). Drastic range contractions within the non-mountain adapted  
771 Luehdorfiini and Zerynthiini (**Figure 4**) could have been driven by aridification events  
772 induced by HTP uplift and mid-Miocene climate warming, with *Hypermnestra* as a relict  
773 group that survived in the Zagros Mountains. In *Parnassius*, colonization of the HTP  
774 coincided with a boost of speciation, followed by dispersal to adjacent areas in the late  
775 Miocene-Pliocene. The long stem branches leading to extant Parnassiinae genera are likely  
776 the result of climate-driven extinction events associated with Cenozoic warming periods, such  
777 as the LOWE and the MMCO. During these periods, Parnassiinae species probably migrated  
778 toward cooler temperatures by colonizing the newly uplifted mountain ranges of the Zagros  
779 and HTP. This agrees with the climate refugia hypothesis, a pattern currently observed in  
780 Himalayan plants, which are shifting their distribution upward along with global warming  
781 (Padma 2014). We argue that the HTP acted as climate refugia during global warming events,  
782 in which pre-adapted parnassiines survived and diversified before re-colonizing ancestral  
783 geographic ranges. It would be interesting to test this hypothesis in other extra-Himalayan  
784 groups that diversified during the HTP orogeny (Favre et al. 2015), as well as in other  
785 mountains around the world for which paleo-elevation data is available (Fjeldså et al. 2012;  
786 Hoorn et al. 2013; Hughes and Atchison 2015).

787

#### 788 ***Ecological interactions via insect-plant diversification and host-plant shifts***

789 Biological interactions among distantly related lineages probably played a major role in the  
790 diversification of clades over geological time (Van Valen 1973; Liow et al. 2015; Silvestro et  
791 al. 2015; Voje et al. 2015). Our analyses identified significant differences in speciation rates

792 associated with different host-plants. Several models (BAMM, MuSSE, and Bayesian  
793 implementations of MuSSE and HiSSE in RevBayes) indicated that *Parnassius* subgenera  
794 associated with Crassulaceae-Saxifragaceae and Papaveraceae have significantly higher rates  
795 of speciation than their relatives feeding in other host plants (**Figures 5, 6**). Interestingly, the  
796 lowest speciation rates are associated with butterflies feeding on Aristolochiaceae, the  
797 inferred ancestral host plant of the Parnassiinae (Condamine et al. 2012). Our results concur  
798 with the ‘escape and radiate’ hypothesis of Ehrlich and Raven (1964), which predicts that the  
799 evolution of a herbivore insect trait (i.e. new tolerance of plant defenses) that allows  
800 colonizing/feeding on a novel host plant lineage would lead to a burst of diversification. The  
801 highly unbalanced extant species richness between Parnassiini and the clade  
802 Luehdorfiini+Zerynthiini, explained above by geographic and climate drivers, might also be  
803 explained by differential speciation rates related to their feeding habit, as well as the overall  
804 low ability of Parnassiinae for shifting between host plants (i.e. transition rates estimated  
805 MuSSE are close to zero).

806 Testing this hypothesis would require reconstruction of the diversification history of  
807 the host-plant clades; this would allow us, for example, to identify shifts that led to reciprocal  
808 changes in diversification in the host plants and to test whether these shifts were accompanied  
809 by matching ancestral geographic distributions between herbivore insects and plants at key  
810 events (Cruaud et al. 2012). Unfortunately, so far there is no complete phylogeny for any of  
811 the large host families for Parnassiinae, including Aristolochiaceae (~500-600 spp.),  
812 Papaveraceae (~700-800 spp.), Crassulaceae (~1300-1500 spp.), and Saxifragaceae (~600-  
813 700 spp.). However, we found a positive correlation between species richness of these plant  
814 lineages and the speciation rates of their insect feeders (MuSSE:  $R^2=0.96$ , BAMM:  $R^2=0.87$ ;  
815 **Appendix 22** on Dryad). This suggests that fast-diversifying clades are associated with  
816 families offering a higher number of potential hosts (akin to niche availability). Janz et al.



817 (2006) found a similar correlation between host-plant diversity and speciation rates in the  
818 Nymphalidae; they posited that recurring oscillations between host-plant expansions (i.e.  
819 incorporation of new plants into the feeding repertoire) and host specialization acted as a  
820 major driving force behind the diversification of plant-feeding insects.

821 In adaptive radiations, the expectation is an initial rapid burst of diversification,  
822 followed by a slowdown in speciation rates as niches are filled up; this is attributed to a  
823 diversity-dependence effect (Phillimore and Price 2008; Etienne et al. 2012). A shift to a new  
824 ecological resource (e.g. a new host plant) can be an adaptive breakthrough (Ehrlich and  
825 Raven 1964), providing higher opportunities for speciation at the start of the radiation, which  
826 significantly decrease as species accumulate. Though we did not detect this diversity-  
827 dependence effect in Parnassiinae, a pattern of speciation decreasing with standing diversity  
828 (and constant extinction rates) was found in *Parnassius*, supporting the hypothesis of this  
829 genus as an example of an adaptive radiation (Rebourg et al. 2006), driven by the evolution of  
830 a new host-plant association. The inference of similar extinction rates in clades of  
831 Parnassiinae feeding on different host plants does agree with Van Valen's (1973) RQ  
832 hypothesis, which assumes constant extinction probabilities shared by all members of any  
833 given higher taxon.

834

### 835 ***Interplay between the Red Queen and the Court Jester***

836 Both abiotic and biotic factors drive species diversification, and biological radiations require  
837 both extrinsic conditions and intrinsic traits – acting in unison or sequentially over time – for  
838 success (Donoghue and Sanderson 2015). A lack of suitable methods and data has resulted in  
839 few studies attempting to merge both types of factors to explain evolutionary radiations  
840 (Bouchenak-Khelladi et al. 2015; Liow et al. 2015; Lagomarsino et al. 2016). Here, we argue  
841 that RQ and CJ-type factors are intimately linked, and they both promote and prevent species

842 diversification. No single but multiple factors explain the diversification of Apollo butterflies,  
843 and the effect of these factors differed across clades. Past changes in climate and elevation  
844 during active orogenic periods jointly mediated the rapid radiation of mountain-dwelling  
845 *Parnassius*, but also triggered extinction events in non-mountain adapted clades Luehdorfiini  
846 and Zerynthiini. The ancestor of Luehdorfiini and Zerynthiini was reconstructed in the  
847 Oligocene as occupying a broad distribution range extending from the Caucasus region, the  
848 Iranian Plateau and the Zagros Mountains, through Central Asia to India (*red box* in **Figure**  
849 **4**). Extinction in Central Asia and India around the Oligocene-Miocene, followed by  
850 independent eastward/northward colonizations by Luehdorfiini and Zerynthiini, could explain  
851 the current disjunct distribution pattern in these two tribes.

852         Our study also demonstrates that ecological traits and biotic interactions such as host-  
853 plant associations and clade-specific diversity-dependence may confer differential  
854 diversification capacity in closely related species co-occurring in the same rapidly changing  
855 environment. In particular, the radiation of *Parnassius* in the HTP seems to have been  
856 fostered by the joint effect of climate and geological changes associated with new biotic  
857 interactions. Mountain uplift promoted speciation by allopatric speciation, but also increased  
858 habitat heterogeneity, and led ultimately to the formation of new niches (ecological  
859 divergence). The colonization of these niches led to new associations with mountain host  
860 species, and potentially to the evolution of new morphological adaptive traits, e.g. denser  
861 setae on the body or altitudinal melanism. Although it is difficult to tease apart the role of key  
862 innovations (new traits that evolved allowing the invasion of a new niche) on ecological  
863 opportunity (the formation of a new environment that confers selective advantage fitness for  
864 the traits), a combination of extrinsic and intrinsic factors seems to have been necessary for  
865 the success of the *Parnassius* radiation. Parnassiinae species feed mostly on plant lineages of  
866 small size whose leaves grow close to the ground and which are characteristic elements of

867 modern temperate vegetation: *Aristolochia* and *Asarum* (Aristolochiaceae) for Luehdorfiini  
868 and Zerynthiini, *Saxifraga* and *Sedum* (Saxifragaceae) and *Rhodiola* (Crassulaceae) for the  
869 subgenus *Parnassius*, or *Corydalis* (Papaveraceae) for the other subgenera of *Parnassius*.  
870 Zhang et al. (2014) inferred an origin of *Rhodiola* (70 spp., mid-Miocene; 12.1 Ma, 6.3-20.2  
871 Ma) and *Sedum* (420 spp., late Oligocene) in the HTP, later spreading to the adjacent regions.  
872 Similarly, Ebersbach et al. (2017) placed the colonization of the HTP by genus *Saxifraga* (370  
873 spp.) in the late Oligocene (20-34 Ma). Therefore, there was a synchronous temporal and  
874 geographic origin of *Parnassius* and its associated host plants in the HTP region. Conversely,  
875 Luehdorfiini and Zerynthiini were unable to evolve new traits or establish novel host-plant  
876 associations to invade the mountain and/or host-plant niches. This calls for further studies to  
877 decipher the genomic baseline for the adaptations to elevation and host plants by comparing  
878 Parnassiini and Luehdorfiini/Zerynthiini (Edger et al. 2015).

879

#### 880 *Underlying model and inference framework in diversification analyses*

881 Models of diversification have traditionally relied on time-continuous (independent) or  
882 autocorrelated rates in the way they model rate-shifts, with few studies applying both types  
883 for macroevolutionary inferences. Here we used both, in particular to estimate speciation and  
884 extinction rates depending on an environmental variable that itself varies through time. The  
885 first model is an ML implementation with a time-continuous birth-death model (Condamine et  
886 al. 2013). For the purpose of this study we implemented Bayesian paleoenvironment-  
887 dependent models but with autocorrelated (RevBayes) and time-continuous (TESS) rates of  
888 diversification. Our comparison across methods has revealed new aspects on the behavior of  
889 the models. The three methods are congruent on the role of orogeny (no effect of orogeny on  
890 diversification *per se*), but they disagree on the effect of temperature (**Figure 8**). The time-  
891 continuous models (RPANDA and TESS) support a positive dependence on speciation and

892 extinction, while the autocorrelated model (RevBayes) shows no dependence. The results  
893 suggest that the lack of correlation found by the RevBayes paleoenvironmental model is  
894 directly a consequence of the assumption of autocorrelation in rates across time intervals.  
895 Thus, the difference lies in the underlying diversification model (autocorrelated vs. time-  
896 continuous rates) and not due to the inference framework (Bayesian vs. ML).

897 Our study shows that multiple approaches must be combined to fully address the  
898 diversification of clades in relation to abiotic and biotic factors. Rather than a single factor,  
899 the joint effect of multiple factors (biogeography, species traits, environmental drivers, and  
900 mass extinction) is responsible for current diversity patterns, and we recommend a  
901 correspondingly multifaceted strategy for the study of these patterns.

902

### 903 **AUTHOR CONTRIBUTIONS**

904 F.L.C., F.A.H.S. and I.S. designed the study; F.L.C. and F.A.H.S collected the data; F.L.C.  
905 analyzed the data with the help of J.R. on SSE models, S.H. on Bayesian implementation of  
906 diversification models, and I.S. on biogeography; F.L.C. and I.S. wrote the paper with  
907 significant contributions from J.R., S.H., and F.A.H.S.

908

### 909 **SUPPLEMENTARY MATERIAL**

910 Data available from the Dryad Digital Repository: [http://dx.doi.org/10.5061/dryad.\[NNNN\]](http://dx.doi.org/10.5061/dryad.[NNNN]).

911

### 912 **FUNDING**

913 This study has been funded by a Marie Curie Action (EU 7<sup>th</sup> Framework Programme)  
914 (BIOMME project, IOF-627684) to F.L.C. (jointly supervised by F.A.H.S. and I.S.), by a  
915 Natural Sciences and Engineering Research Council of Canada (NSERC), Discovery Grant to  
916 F.A.H.S., and by MINECO/FEDER (CGL2015-67489-P) to I.S.

917

918 **ACKNOWLEDGMENTS**

919 We thank Sylvain Piry for help on the script for GenBank, Mark Miller for assistance on the  
920 CIPRES cluster.

921

922 **REFERENCES**

923 Ackery P.R. 1975. A guide to the genera and species of Parnassiinae (Lepidoptera:  
924 Papilionidae). Bull. British Mus. (Nat. Hist.), Entomol. 31:71-105.

925 Armijo R., Lacassin R., Coudurier-Curveur A., Carrizo D. 2015. Coupled tectonic evolution  
926 of Andean orogeny and global climate. Earth-Sci. Rev. 143:1-35.

927 Ayres D.L., Darling A., Zwickl D.J., Beerli P., Holder M.T., Lewis P.O., Huelsenbeck J.P.,  
928 Ronquist F., Swofford D.L., Cummings M.P., Rambaut A., Suchard M.A. 2012.  
929 BEAGLE: an application programming interface and high-performance computing  
930 library for statistical phylogenetics. Syst. Biol. 61:170-173.

931 Baele G., Li W.L.S., Drummond A.J., Suchard M.A., Lemey P. 2013. Accurate model  
932 selection of relaxed clocks in Bayesian phylogenetics. Mol. Biol. Evol. 30:239–243.

933 Barnosky A.D. 2001. Distinguishing the effects of the Red Queen and Court Jester on  
934 Miocene mammal evolution in the northern Rocky Mountains. J. Verteb. Paleontol.  
935 21:172-185.

936 Beaulieu J.M., O’Meara B.C. 2016. Detecting hidden diversification shifts in models of trait-  
937 dependent speciation and extinction. Syst. Biol. 65:583–601.

938 Benton M.J. 2009. The red queen and the court jester: species diversity and the role of biotic  
939 and abiotic factors through time. Science 323:728–732.

940 Benton M.J. 2015. Exploring macroevolution using modern and fossil data. Proc. R. Soc. B  
941 282:20150569.

- 942 Böhme M. 2003. The Miocene Climatic Optimum: evidence from ectothermic vertebrates of  
943 Central Europe. *Palaeogeogr. Palaeoclim. Palaeoecol.* 195:389-401.
- 944 Bollino M., Racheli T. 2012. *Parnassiinae (Partim). Parnassiini (Partim), Luehdorfiini,*  
945 *Zerynthiini.* In: Bauer E., Frankenbach T., editors. *Butterflies of the World,*  
946 *Supplement 20.* Germany: Goecke und Evers, Keltern.
- 947 Bouchenak-Khelladi Y., Onstein R.E., Xing Y., Schwery O., Linder H.P. 2015. On the  
948 complexity of triggering evolutionary radiations. *New Phytol.* 207:313–326.
- 949 Bouilhol P., Jagoutz O., Hanchar J.M., Dudas F.O. 2013. Dating the India–Eurasia collision  
950 through arc magmatic records. *Earth Planet. Sci. Lett.* 366:163–175.
- 951 Brikiatis L. 2014. The De Geer, Thulean and Beringia routes: key concepts for understanding  
952 early Cenozoic biogeography. *J Biogeogr.* 41:1036-1054.
- 953 Britton T., Anderson C.L., Jacquet D., Lundqvist S., Bremer K. 2007. Estimating divergence  
954 times in large phylogenetic trees. *Syst. Biol.* 56:741–752.
- 955 Brock C.D., Harmon L.J., Alfaro M.E. 2011. Testing for temporal variation in diversification  
956 rates when sampling is incomplete and nonrandom. *Syst. Biol.* 60:410-419.
- 957 Carpenter F.M. 1992. *Treatise on Invertebrate Paleontology, Part R, Arthropoda 3-4.*  
958 *Geological Society of America, Boulder, Colorado.*
- 959 Churkin S. 2006. A new species of *Parnassius* Latreille, 1804 from Kyrgyzstan (Lepidoptera,  
960 *Papilionidae*) *Helios* 7:142-158.
- 961 Collins N.M., Morris M.G. 1985. *Threatened Swallowtail Butterflies of the World.* The IUCN  
962 *Red Data Book,* Cambridge.
- 963 Condamine F.L., Sperling F.A., Wahlberg N., Rasplus J.Y., Kergoat G.J. 2012. What causes  
964 latitudinal gradients in species diversity? Evolutionary processes and ecological  
965 constraints on swallowtail biodiversity. *Ecol. Lett.* 15:267–277.

- 966 Condamine F.L., Rolland J., Morlon H. 2013. Macroevolutionary perspectives to  
967 environmental change. *Ecol. Lett.* 16:72–85.
- 968 Condamine F.L., Toussaint E.F.A., Clamens A.-L., Genson G., Sperling F.A.H., Kergoat G.J.  
969 2015a. Deciphering the evolution of birdwing butterflies 150 years after Alfred  
970 Russell Wallace. *Sci. Rep.* 5:11860.
- 971 Condamine F.L., Nagalingum N.S., Marshall C.R., Morlon H. 2015b. Origin and  
972 diversification of living cycads: A cautionary tale on the impact of the branching  
973 process prior on Bayesian molecular dating. *BMC Evol. Biol.* 15:65.
- 974 Cornell H.V. 2013. Is regional species diversity bounded or unbounded? *Biol. Rev.* 88:140–  
975 165.
- 976 Cruaud A., Rønsted N., Chantarasuwan B., Chou L.S., Clement W., Couloux A., Cousins B.,  
977 Forest F., Genson G., Harrison R.D., Hossaert-McKey M., Jabbour-Zahab R.,  
978 Jousselin E., Kerdelhué C., Kjellberg F., Lopez-Vaamonde C., Peebles J., Pereira  
979 R.A.S, Schramm T., Ubaidillah R., van Noort S., Weiblen G.D., Yang D.R, Yan-  
980 Qiong P., Yodpinyanee A., Libeskind-Hadas R., Cook J.M., Rasplus J.Y., Savolainen  
981 V. 2012. An extreme case of plant-insect co-diversification: figs and fig-pollinating  
982 wasps. *Syst. Biol.* 61:1029-1047.
- 983 Cusimano N., Renner S.S. 2010. Slowdowns in diversification rates from real phylogenies  
984 may be not real. *Syst. Biol.* 59:458-464.
- 985 Dapporto L. 2010. Speciation in Mediterranean refugia and post-glacial expansion of  
986 *Zerynthia polyxena* (Lepidoptera, Papilionidae). *J. Zoolog. Syst. Evol. Res.* 48:229–  
987 237.
- 988 Davis M.P., Midford P.E., Maddison W.P. 2013. Exploring power and parameter estimation  
989 of the BiSSE method for analysing species diversification. *BMC Evol. Biol.* 13:38.

- 990 DeChaine E.G., Martin A.P. 2004. Historic cycles of fragmentation and expansion in  
991 *Parnassius smintheus* (Papilionidae) inferred using mitochondrial DNA. *Evolution*  
992 58:113–127.
- 993 Donoghue MJ, Sanderson MJ. 2015. Confluence, synnovation, and depauperons in plant  
994 diversification. *New Phytol.* 207:260-274.
- 995 Donoghue M.J., Doyle J.A., Gauthier J., Kluge A.G., Rowe T. 1989. The importance of  
996 fossils in phylogeny reconstruction. *Annu. Rev. Ecol. Syst.* 20:431–460.
- 997 Drummond A.J., Ho S.Y.W., Phillips M.J., Rambaut A. 2006. Relaxed phylogenetics and  
998 dating with confidence. *PLoS Biol.* 4:e88.
- 999 Drummond C.S., Eastwood R.J., Miotto S.T., Hughes C.E. 2012a. Multiple continental  
1000 radiations and correlates of diversification in *Lupinus* (Leguminosae): testing for key  
1001 innovation with incomplete taxon sampling. *Syst. Biol.* 61:443–460.
- 1002 Drummond A., Suchard M.A., Xie D., Rambaut A. 2012b. Bayesian phylogenetics with  
1003 BEAUti and the BEAST 1.7. *Mol. Biol. Evol.* 29:1969-1973.
- 1004 Durden C.J., Rose H. 1978. Butterflies from the middle Eocene: The earliest occurrence of  
1005 fossil Papilionidae. *Prace-Sellards Ser. Tax. Mem. Mus.* 29:1–25.
- 1006 Ebersbach J., Muellner-Riehl A.N., Michalak I., Tkach N., Hoffmann M.H., Röser M., Sun  
1007 H., Favre A. 2017. In and out of the Qinghai-Tibet Plateau: divergence time estimation  
1008 and historical biogeography of the large arctic-alpine genus *Saxifraga* L. *J. Biogeogr.*  
1009 44:900-910.
- 1010 Edger P.P., Heidel-Fischer H.M., Bekaert M., Rota J., Glöckner G., Platts A.E., Heckel D. G.,  
1011 Der J., Wafula E., Tang M., Hofberger J.A., Smithson A., Hall J.C., Blanchette M.,  
1012 Bureau T.E., Wright S.I., dePamphilis C.W., Schranz M.E., Barker M.S., Conant G.C.,  
1013 Wahlberg N., Vogel H., Pires J.C., Wheat C.W. 2015: The butterfly plant arms-race



- 1014           escalated by gene and genome duplications. *Proc. Natl. Acad. Sci. USA* 112:8362-  
1015           8366.
- 1016   Edwards E.J., Osborne C.O., Stromberg C.A.E., Smith S.A., the C<sub>4</sub> Grasses Consortium.  
1017           2010. The origins of C<sub>4</sub> grasslands: integrating evolutionary and ecosystem science.  
1018           *Science* 328:587–591.
- 1019   Ehrlich P.R., Raven P.H. 1964. Butterflies and plants: a study in coevolution. *Evolution*  
1020           18:586–608.
- 1021   Erwin D.H. 2009. Climate as a driver of evolutionary change. *Curr. Biol.* 19:R575–R583.
- 1022   Etienne R.S., Haegeman B., Stadler T., Aze T., Pearson P.N., Purvis A., Phillimore A.B.  
1023           2012. Diversity-dependence brings molecular phylogenies closer to agreement with  
1024           the fossil record. *Proc. Roy. Soc. Lond. B* 279:1300–1309.
- 1025   Ezard T.H.G., Aze T., Pearson P.N., Purvis A. 2011. Interplay between changing climate and  
1026           species' ecology drives macroevolutionary dynamics. *Science* 332:349–351.
- 1027   Ezard T.H.G., Quental T.B., Benton M.J. 2016. The challenges to inferring the regulators of  
1028           biodiversity in deep time. *Philos. Trans. R. Soc. B* 371:20150216.
- 1029   Favre A., Päckert M., Pauls S.U., Jähnig S.C., Uhl D., Michalak I., Muellner-Riehl A.N.  
1030           2015. The role of the uplift of the Qinghai-Tibetan Plateau for the evolution of Tibetan  
1031           biotas. *Biol. Rev.* 90:236-253.
- 1032   FitzJohn R.G. 2012. Diversitree: comparative phylogenetic analyses of diversification in R.  
1033           *Methods Ecol. Evol.* 3:1084-1092.
- 1034   FitzJohn R.G., Maddison W.P., Otto S.P. 2009. Estimating trait-dependent speciation and  
1035           extinction rates from incompletely resolved phylogenies. *Syst. Biol.* 58:595–611.
- 1036   Fjeldså J., Bowie R.C.K., Rahbek C. 2012. The role of mountain ranges in the diversification  
1037           of birds. *Annu. Rev. Ecol. Evol. Syst.* 43:249-265.

- 1038 Frankenbach T., Bollino M., Racheli T. 2012. Papilionidae XIV: Hypermnestra, Luehdorfiini,  
1039 Zerynthiini. In: Bauer E., Frankenbach T., editors. Butterflies of the World, Part 36.  
1040 Germany: Goecke und Evers, Keltern.
- 1041 Gavin D.G., Fitzpatrick M.C., Gugger P.F., Heath K.D., Rodríguez-Sánchez F., Dobrowski  
1042 S.Z., Hampe A., Hu F.S., Ashcroft M.B., Bartlein P.J., Blois J.L., Carstens B.C., Davis  
1043 E.B., de Lafontaine G., Edwards M.E., Fernandez M., Henne P.D., Herring E.M.,  
1044 Holden Z.A., Kong W.S., Liu J., Magri D., Matzke N.J., McGlone M.S., Saltré F.,  
1045 Stigall A.L., Tsai Y.H., Williams J.W. 2014. Climate refugia: joint inference from  
1046 fossil records, species distribution models and phylogeography. *New Phytol.* 204:37-  
1047 54.
- 1048 Gernhard T. 2008. The conditioned reconstructed process. *J. Theor. Biol.* 253:769–778.
- 1049 Givnish T.J., Spalink D., Ames M., Lyon S.P., Hunter S.J., Zuluaga A., Iles W.J.D., Clements  
1050 M.A., Arroyo M.T.K., Leebens-Mack J., Endara L., Kriebel R., Neubig K.M., Whitten  
1051 W.M., Williams N.H., Cameron K.M. 2015. Orchid phylogenomics and multiple  
1052 drivers of their extraordinary diversification. *Proc. R. Soc. B* 282: 20151553.
- 1053 Goldberg E.E., Lancaster L.T., Ree R.H. 2011. Phylogenetic inference of reciprocal effects  
1054 between geographic range evolution and diversification. *Syst. Biol.* 60:451–465.
- 1055 Gradstein F.M., Ogg J.G., Schmitz M., Ogg G. 2012. The geologic time scale 2012. Boston  
1056 (USA): Elsevier. 1176 pp.
- 1057 Gratton P., Konopiński M.K., Sbordoni V. 2008. Pleistocene evolutionary history of the  
1058 clouded apollo (*Parnassius mnemosyne*): genetic signatures of climate cycles and a  
1059 ‘time-dependent’ mitochondrial substitution rate. *Mol. Ecol.* 17:4248–4262.
- 1060 Hiura L. 1980. A phylogeny of the genera of Parnassiinae based on analysis of wing pattern,  
1061 with description of a new genus (Lepidoptera: Papilionidae). *Bull. Osaka Mus. Natural*  
1062 *Hist.* 33:71-85.

- 1063 Ho S.Y.W., Phillips M.J. 2009. Accounting for calibration uncertainties in phylogenetic  
1064 estimation of evolutionary divergence times. *Syst. Biol.* 58:367–380.
- 1065 Höhna S. 2015. The time-dependent reconstructed evolutionary process with a key-role for  
1066 mass-extinction events. *J. Theoret. Biol.* 380:321–331.
- 1067 Höhna S., Stadler T., Ronquist F., Britton T. 2011. Inferring speciation and extinction rates  
1068 under different sampling schemes. *Mol. Biol. Evol.* 28:2577–2589.
- 1069 Höhna S., Landis M.J., Heath T.A., Boussau B., Lartillot N., Moore B.R., Huelsenbeck J.P.,  
1070 Ronquist F. 2016a. RevBayes: Bayesian phylogenetic inference using graphical  
1071 models and an interactive model-specification language. *Syst. Biol.* 65:726–736.
- 1072 Höhna S., May M.R., Moore B.R. 2016b. TESS: an R package for efficiently simulating  
1073 phylogenetic trees and performing Bayesian inference of lineage diversification rates.  
1074 *Bioinformatics* 32:789–791.
- 1075 Hoorn C., Mosbrugger V., Mulch A., Antonelli A. 2013 Biodiversity from mountain building.  
1076 *Nature Geosci.* 6:154–154.
- 1077 Huelsenbeck J.P., Larget B., Alfaro M.E. 2004. Bayesian phylogenetic model selection using  
1078 reversible jump Markov chain Monte Carlo. *Mol. Biol. Evol.* 21:1123–1133.
- 1079 Hughes C.E., Atchison G.W. 2015. The ubiquity of alpine plant radiations: from the Andes to  
1080 the Hengduan Mountains. *New Phytol.* 207:275–282.
- 1081 Hutter C.R., Guayasamin J.M., Wiens J.J. 2013. Explaining Andean megadiversity: the  
1082 evolutionary and ecological causes of glassfrog elevational richness patterns. *Ecol.*  
1083 *Lett.* 16:1135–1144.
- 1084 Janz N., Nylin S., Wahlberg N. 2006. Diversity begets diversity: host expansions and the  
1085 diversification of plant-feeding insects. *BMC Evol. Biol.* 6:4.
- 1086 de Jong R. 2007. Estimating time and space in the evolution of the Lepidoptera. *Tijdschrift v.*  
1087 *Entomol.* 150:319–346.

- 1088 Jønsson K.A., Fabre P.H., Fritz S.A., Etienne R.S., Ricklefs R.E., Jørgensen T.B., Fjeldså J.,  
1089 Rahbek C., Ericson P.G.P., Woog F., Pasquet E., Irestedt M. 2012. Ecological and  
1090 evolutionary determinants for the adaptive radiation of the Madagascan vangas. Proc.  
1091 Natl. Acad. Sci. USA 109:6620-6625.
- 1092 Kass R.E., Raftery A.E. 1995. Bayes factors. J. Am. Stat. Assoc. 90:773–795.
- 1093 Katoh K., Standley D.M. 2013. MAFFT multiple sequence alignment software version 7:  
1094 improvements in performance and usability. Mol. Biol. Evol. 30:772-780.
- 1095 Katoh T., Chichvarkin A., Yagi T., Omoto K. 2005. Phylogeny and evolution of butterflies of  
1096 the genus *Parnassius*: inferences from mitochondrial 16S and ND1 sequences. Zool.  
1097 Sci. 22:343–351.
- 1098 Keyghobadi N, Roland J, Strobeck C. 2005. Genetic differentiation and gene flow among  
1099 populations of the alpine butterfly, *Parnassius smintheus*, vary with landscape  
1100 connectivity. Mol. Ecol. 14:1897-1909.
- 1101 Kocman S. 2009. Parnassius of Tibet and the Adjacent Areas. Vadim Tshikolovets,  
1102 Pardubice, Czech Republic.
- 1103 Lagomarsino L.P., Condamine F.L., Antonelli A., Mulch A., Davis C.C. 2016. The abiotic  
1104 and biotic drivers of rapid diversification in Andean bellflowers (Campanulaceae).  
1105 New Phytol. 210:1430-1442.
- 1106 Lanfear R., Calcott B., Ho SYW, Guindon S. 2012. PartitionFinder: Combined selection of  
1107 partitioning schemes and substitution models for phylogenetic analyses. Mol. Biol.  
1108 Evol. 29:1695-1701.
- 1109 Lewis P.O. 2001. A likelihood approach to estimating phylogeny from discrete morphological  
1110 character data. Syst. Biol. 50:913–925.

- 1111 Liow L.H., Reitan T., Harnik P.G. 2015. Ecological interactions on macroevolutionary time  
1112 scales: clams and brachiopods are more than ships that pass in the night. *Ecol. Lett.*  
1113 18:1030-1039.
- 1114 Liu Z., Pagani M., Zinniker D., DeConto R., Huber M., Brinkhuis H., Shah S.R., Leckie  
1115 R.M., Pearson A. 2009. Global cooling during the Eocene-Oligocene climate  
1116 transition. *Science* 323:1187-1190.
- 1117 Maddison W.P., FitzJohn R.G. 2015. The unsolved challenge to phylogenetic correlation tests  
1118 for categorical characters. *Syst. Biol.* 64:127-136.
- 1119 Maddison W.P., Midford P.E., Otto S.P. 2007. Estimating a binary character's effect on  
1120 speciation and extinction. *Syst. Biol.* 56:701–710.
- 1121 Magallón S., Gómez-Acevedo S., Sánchez-Reyes L.L., Hernández-Hernández T. 2015. A  
1122 metacalibrated time-tree documents the early rise of flowering plant phylogenetic  
1123 diversity. *New Phytol.* 207:437-453.
- 1124 Matzke N.J. 2014. Model selection in historical biogeography reveals that founder-event  
1125 speciation is a crucial process in island clades. *Syst. Biol.* 63:951-970.
- 1126 May M.R., Höhna S., Moore B.R. 2016. A Bayesian approach for detecting the impact of  
1127 mass-extinction events on molecular phylogenies when rates of lineage diversification  
1128 may vary. *Methods Ecol. Evol.* 7:947–959.
- 1129 Mayhew P.J., Jenkins G.N., Benton T.G. 2008. A long-term association between global  
1130 temperature and biodiversity, origination and extinction in the fossil record. *Proc. R.*  
1131 *Soc. Lond. B.* 275:47–53.
- 1132 Michel F., Rebourg C., Cosson E., Descimon H. 2008. Molecular phylogeny of Parnassiinae  
1133 butterflies (Lepidoptera: Papilionidae) based on the sequences of four mitochondrial  
1134 DNA segments. *Ann. Soc. Entomol. Fr.* 44:1-36.

- 1135 Migliore J., Baumel A., Juin M., Fady B., Roig A., Duong N., Médail F. 2013. Surviving in  
1136 Mountain climate refugia: New insights from the genetic diversity and structure of the  
1137 relict shrub *Myrtus nivellei* (Myrtaceae) in the Sahara Desert. PLoS One 8:e73795.
- 1138 Miller M.A., Schwartz T., Pickett B.E., He S., Klem E.B., Scheuermann R.H., Passarotti M.,  
1139 Kaufman S., O’Leary M.A. 2015. A RESTful API for access to phylogenetic tools via  
1140 the CIPRES Science Gateway. Evol Bioinformatics 11:43–48.
- 1141 Moen D., Morlon H. 2014. Why does diversification slow down? Trends Ecol. Evol. 29:190-  
1142 197.
- 1143 Moore B.R., Höhna S., May M.R., Rannala B., Huelsenbeck J.P. 2016. Critically evaluating  
1144 the theory and performance of Bayesian analysis of macroevolutionary mixtures. Proc.  
1145 Natl. Acad. Sci. USA 113:9569–9574.
- 1146 Morlon H. 2014. Phylogenetic approaches for studying diversification Ecol. Lett. 17:508-525.
- 1147 Morlon H., Parsons T.L., Plotkin J. 2011. Reconciling molecular phylogenies with the fossil  
1148 record. Proc. Natl. Acad. Sci. USA 108:16327–16332.
- 1149 Nazari V., Sperling F.A.H. 2007. Mitochondrial DNA divergence and phylogeography in  
1150 western Palaearctic Parnassiinae (Lepidoptera: Papilionidae): how many species are  
1151 there? Insect Syst. Evol. 38:121–138.
- 1152 Nazari V., Zakharov E.V., Sperling F.A.H. 2007. Phylogeny, historical biogeography, and  
1153 taxonomic ranking of Parnassiinae (Lepidoptera: Papilionidae) based on morphology  
1154 and seven genes. Mol. Phylogenet. Evol. 42:131-156.
- 1155 Nee S., May R.M., Harvey P.H. 1994. The reconstructed evolutionary process. Phil. Trans. R.  
1156 Soc. B 344:305–311.
- 1157 Ng J., Smith S.D. 2014. How traits shape trees: new approaches for detecting character state-  
1158 dependent lineage diversification. J. Evol. Biol. 27:2035-2045.

- 1159 Omoto K., Katoh T., Chichvarkin A., Yagi T. 2004. Molecular evolution of the ‘apollo’  
1160 butterflies of the genus *Parnassius* (Lepidoptera: Papilionidae). *Gene* 326:141-147.
- 1161 Omoto K., Yonezawa T., Shinkawa T. 2009. Molecular systematics and evolution of the  
1162 recently discovered “Parnassian” butterfly (*Parnassius davydovi* Churkin, 2006) and  
1163 its allied species (Lepidoptera, Papilionidae). *Gene* 441:80-88.
- 1164 Padma T.V. 2014. Himalayan plants seek cooler climes. *Nature* 512:359.
- 1165 Palazzesi L., Hidalgo O., Barreda V.D, Forest F., Höhna S. submitted. Radiation of the  
1166 Grassland biome during a falling CO<sub>2</sub> world.
- 1167 Pérez-Escobar O.A., Chomicki G., Condamine F.L., Karremans A.P., Bogarín D., Matzke  
1168 N.J.,Silvestro D., Antonelli A. 2017. Recent origin and rapid speciation of Neotropical  
1169 orchids in the world's richest plant biodiversity hotspot. *New Phytol.* 215:891-905.
- 1170 Phillimore A.B., Price T.D. 2008. Density-dependent cladogenesis in birds. *PLoS Biol.* 6:e71.
- 1171 Pokorny L., Riina R., Mairal M., Meseguer A.S., Culshaw V., Cendoya J., Serrano M.,  
1172 Carbajal R., Ortiz S., Heuertz M., Sanmartín I. 2015. Living on the edge: timing of  
1173 Rand Flora disjunctions congruent with ongoing aridification in Africa. *Frontiers*  
1174 *Genet.* 6:154.
- 1175 Pound M.J., Haywood A.M., Salzmann U., Riding J.B. 2012. Global vegetation dynamics and  
1176 latitudinal temperature gradients during the Mid to Late Miocene (15.97–5.33 Ma).  
1177 *Earth-Sci. Rev.* 112:1–22.
- 1178 Price T.D., Hooper D.M., Buchanan C.D., Johansson U.S., Tietze D.T., Alström P., Olsson  
1179 U., Ghosh-Harihar M., Ishtiaq F., Gupta S.K., Martens J., Harr B., Singh P., Mohan D.  
1180 2014. Niche filling slows the diversification of Himalayan songbirds. *Nature* 509:222-  
1181 225.
- 1182 Quade J., Cerling T., Bowman J. 1989. Development of Asian monsoon revealed by marked  
1183 ecological shift during the latest Miocene in Northern Pakistan. *Nature* 342:163–166.

- 1184 Rabosky D.L., Santini F., Eastman J.M., Smith S.A., Sidlauskas B., Chang J., Alfaro M.E.  
1185 2013. Rates of speciation and morphological evolution are correlated across the largest  
1186 vertebrate radiation. *Nat. Commun.* 4:1958.
- 1187 Rabosky D.L., Lovette, I.J. 2008. Explosive evolutionary radiations: decreasing speciation or  
1188 increasing extinction through time? *Evolution* 62:1866–1875.
- 1189 Rabosky D.L., Goldberg E.E. 2015. Model inadequacy and mistaken inferences of trait-  
1190 dependent speciation. *Syst. Biol.* 64:340-355.
- 1191 Rabosky D.L., Donnellan S.C., Grundler M., Lovette I.J. 2014. Analysis and visualization of  
1192 complex macroevolutionary dynamics: An example from Australian scincid lizards.  
1193 *Syst. Biol.* 63:610-627.
- 1194 Rabosky D.L., Grundler M., Anderson C., Shi J.J., Brown J.W., Huang H., Larson J.G.  
1195 2014b. BAMMtools: an R package for the analysis of evolutionary dynamics on  
1196 phylogenetic trees. *Methods Ecol. Evol.* 5:701-707.
- 1197 Rabosky D.L., Mitchell J.S., Chang J. 2017. Is BAMM flawed? Theoretical and practical  
1198 concerns in the analysis of multi-rate diversification models. *Syst. Biol.*  
1199 [doi.org/10.1093/sysbio/syx037](https://doi.org/10.1093/sysbio/syx037).
- 1200 Rambaut A., Drummond A.J. 2009. Tracer v1.6. Available at <http://beast.bio.ed.ac.uk/Tracer>.
- 1201 Rasnitsyn A.P., Zherikhin V.V. 2002. Appendix: Alphabetic list of selected insect fossil sites.  
1202 Impression fossils. In: Rasnitsyn A.P., Quicke D.L.J. (Ed.), *History of Insects*. Kluwer  
1203 Academic Publishers, Dordrecht, Boston & London, pp. 437–444.
- 1204 Rebel H. 1898. Fossile Lepidopteren aus der Miocänformation von Gabbro. *Sitzungsberichte*  
1205 *der Kaiserlichen Akademie der Wissenschaften, Mathematisch-Naturwissenschaftliche*  
1206 *Classe* 107:731-745.
- 1207 Rebourg C., Péténian F., Cosson E., Faure E. 2006. Patterns of speciation and adaptive  
1208 radiation in *Parnassius* butterflies. *J. Entomol.* 3:204-215.



- 1209 Ree R.H., Smith S.A. 2008. Maximum-likelihood inference of geographic range evolution by  
1210 dispersal, local extinction, and cladogenesis. *Syst. Biol.* 57:4–14.
- 1211 Renner S.S. 2016. Available data point to a 4-km-high Tibetan Plateau by 40 Ma, but 100  
1212 molecular-clock papers have linked supposed recent uplift to young node ages. *J.*  
1213 *Biogeogr.* 43:1479-1487.
- 1214 Revell, L.J. 2012. phytools: an R package for phylogenetic comparative biology (and other  
1215 things). *Methods Ecol. Evol.* 3:217-223.
- 1216 Rolland J., Condamine F.L., Jiguet F., Morlon H. 2014. Faster speciation and reduced  
1217 extinction in the tropics contribute to the mammalian latitudinal diversity gradient.  
1218 *PLoS Biol.* 12:e1001775.
- 1219 Roland J., Keyghobadi N., Fownes S. 2000. Alpine *Parnassius* butterfly dispersal: effects of  
1220 landscape and population size. *Ecology* 81:1642–1653.
- 1221 Ronquist F., Klopstein S., Vilhelmsen L., Schulmeister S., Murray D.L., Rasnitsyn A.P.  
1222 2012a. A total-evidence approach to dating with fossils, applied to the early radiation  
1223 of the Hymenoptera. *Syst. Biol.* 61:973–999.
- 1224 Ronquist F., Teslenko M., van der Mark P., Ayres D.L., Darling A., Höhna S., Larget B., Liu  
1225 L., Suchard M.A., Huelsenbeck J.P. 2012b. MrBayes 3.2: Efficient Bayesian  
1226 phylogenetic inference and model choice across a large model space. *Syst. Biol.*  
1227 61:539-542.
- 1228 Ronquist F., Sanmartín I. 2011. Phylogenetic methods in biogeography. *Annu. Rev. Ecol.*  
1229 *Evol. Syst.* 42:441-464.
- 1230 Ruane S., Bryson R.W. Jr., Pyron R.A., Burbrink F.T. 2014. Coalescent species delimitation  
1231 in milksnakes (genus *Lampropeltis*) and impacts on phylogenetic comparative  
1232 analyses. *Syst. Biol.* 63:231-250.

- 1233 Sanmartín I., Meseguer A.S. 2016. Extinction in phylogenetics and biogeography: From  
1234 timetrees to patterns of biotic assemblage. *Front. Genet.* 7:35.
- 1235 Sanmartín I., Enghoff H., Ronquist F. 2001. Patterns of animal dispersal, vicariance and  
1236 diversification in the Holarctic. *Biol. J. Linn. Soc.* 73:345–390.
- 1237 Sauquet H., Ho S.Y.W., Gandolfo M.A., Jordan G.J., Wilf P., Cantrill D.J., Bayly M.J.,  
1238 Bromham L., Brown G.K., Carpenter R.J., Lee D.M., Murphy D.J., Sniderman J.M.K.,  
1239 Udovicic F. 2012. Testing the impact of calibration on molecular divergence times  
1240 using a fossil-rich group: the case of *Nothofagus* (Fagales). *Syst. Biol.* 61:289–313.
- 1241 Schnitzler J., Barraclough T.G., Boatwright J.S., Goldblatt P., Manning J.C., Powell M.P.,  
1242 Rebelo T., Savolainen V. 2011. Causes of plant diversification in the Cape  
1243 biodiversity hotspot of South Africa. *Syst. Biol.* 60:343–357.
- 1244 Schoville S.D., Roderick G.K. 2009. Alpine biogeography of Parnassian butterflies during  
1245 Quaternary climate cycles in North America. *Mol. Ecol.* 18:3471–3485.
- 1246 Scriber J.M., Tsubaki Y., Lederhouse R.C. 1995. Swallowtail Butterflies: Their Ecology and  
1247 Evolutionary Biology. Scientific Publishers, Gainesville.
- 1248 Scriber J.M. 1984. Larval foodplant utilization by the world Papilionidae (Lep.): latitudinal  
1249 gradients reappraised. *Acta Rhopaloc.* 6:1–50.
- 1250 Scudder S.H. 1875. Fossil Butterflies. *Memoirs of the American Association for the*  
1251 *Advancement of Science I: I-XI.* Salem, Massachusetts. pp. 1–99.
- 1252 Sepulchre P., Ramstein G., Fluteau F., Schuster M., Tiercelin J.-J., Brunet M. 2006. Tectonic  
1253 uplift and Eastern Africa aridification. *Science* 313:1419-1423.
- 1254 Silvestro D., Antonelli A., Salamin N., Quental T.B. 2015. The role of clade competition in  
1255 the diversification of North American canids. *Proc. Natl. Acad. Sci. USA* 112: 8684–  
1256 8689.

- 1257 Smith B.T., McCormack J.E., Cuervo A.M., Hickerson M.J., Aleixo A., Cadena C.D., Pérez-  
1258 Emán J., Burney C.W., Xie X., Harvey M.G., Faircloth B.C., Glenn T.C., Derryberry  
1259 E.P., Prejean J., Fields S., Brumfield R.T. 2014. The drivers of tropical speciation.  
1260 Nature 515:406-409.
- 1261 Smith M.E., Singer B., Carroll A. 2003.  $^{40}\text{Ar}/^{39}\text{Ar}$  geochronology of the Eocene Green River  
1262 Formation, Wyoming. Geol. Soc. Am. Bull. 115:549-565.
- 1263 Sohn J.-C., Labandeira C., Davis D., Mitter C. 2012. An annotated catalog of fossil and  
1264 subfossil Lepidoptera (Insecta: Holometabola) of the world. Zootaxa 3286:1–132.
- 1265 Sohn J.-C., Labandeira C.C., Davis D.R. 2015. The fossil record and taphonomy of butterflies  
1266 and moths (Insecta, Lepidoptera): implications for evolutionary diversity and  
1267 divergence-time estimates. BMC Evol. Biol. 15:12.
- 1268 Stadler T. 2011. Mammalian phylogeny reveals recent diversification rate shifts. Proc. Natl.  
1269 Acad. Sci. USA 108:6187–6192.
- 1270 Stadler T. 2013. Recovering speciation and extinction dynamics based on phylogenies. J.  
1271 Evol. Biol. 26:1203-1219.
- 1272 Strimmer K., Pybus O.G. 2001. Exploring the demographic history of DNA sequences using  
1273 the generalized skyline plot. Mol. Biol. Evol. 18:2298-2305.
- 1274 Tan J., Kelly C.K., Jiang L. 2013. Temporal niche promotes biodiversity during adaptive  
1275 radiation. Nature Comm. 4:2102.
- 1276 Todisco V., Gratton P., Cesaroni D., Sbordoni V. 2010. Phylogeography of *Parnassius*  
1277 *apollo*: hints on taxonomy and conservation of a vulnerable glacial butterfly invader.  
1278 Biol. J. Linn. Soc. 101:169–183.
- 1279 Todisco V., Gratton P., Zakharov E.V., Wheat C.W., Sbordoni V., Sperling F.A.H. 2012.  
1280 Mitochondrial phylogeography of the Holarctic *Parnassius phoebus* complex supports  
1281 a recent refugial model for alpine butterflies. J. Biogeogr. 39:1058-1072.

- 1282 Tyler H.A., Brown K.S., Wilson K. 1994. Swallowtail Butterflies of the Americas: A Study in  
1283 Biological Dynamics, Ecological Diversity, Biosystematics and Conservation.  
1284 Scientific Publishers, Gainesville.
- 1285 Van Valen L.M. 1973. A new evolutionary law. *Evol. Theory* 1:1-30.
- 1286 Voje K.L., Holen Ø.H., Liow L.H., Stenseth N.C. 2015. The role of biotic forces in driving  
1287 macroevolution: beyond the Red Queen. *Proc. Roy. Soc. Lond. B* 282: 20150186.
- 1288 Wagner C.E., Harmon L.J., Seehausen O. 2012. Ecological opportunity and sexual selection  
1289 together predict adaptive radiation. *Nature* 487:366-369.
- 1290 Wallace A.R. 1878. *Tropical Nature and Other Essays*. Macmillan and Co, London.
- 1291 Weiss J.C. 1991-2005. *The Parnassiinae of the World*. Part I 1991, II 1992, III 1999, IV 2005.  
1292 Sciences Nat, Venette, 400 p.
- 1293 Wen J., Zhang J.-C., Nie Z.-L., Zhong Y., Sun H. 2014. Evolutionary diversifications of  
1294 plants on the Qinghai-Tibetan Plateau. *Front. Genet.* 5:4.
- 1295 Xie W., Lewis P.O., Fan Y., Kuo L., Chen M.H. 2011. Improving marginal likelihood  
1296 estimation for Bayesian phylogenetic model selection. *Syst. Biol.* 60:150–160.
- 1297 Xing Y., Ree, R.H. 2017. Uplift-driven diversification in the Hengduan Mountains, a  
1298 temperate biodiversity hotspot. *Proc. Natl Acad. Sci. USA* 114:E3444-E3451.
- 1299 Yang Z., Rannala B. 2006. Bayesian estimation of species divergence times under a  
1300 molecular clock using multiple calibrations with soft bounds. *Mol. Biol. Evol.* 23:212–  
1301 226.
- 1302 Zachos J.C., Dickens G.R., Zeebe R.E. 2008. An early Cenozoic perspective on greenhouse  
1303 warming and carbon-cycle dynamics. *Nature* 451:279–283.
- 1304 Zhang J.-Q., Meng S.-Y., Allen G.A., Wen J., Rao G.-Y. 2014. A rapid radiation and  
1305 dispersal out of the Qinghai-Tibetan Plateau of an alpine plant lineage *Rhodiola*  
1306 (Crassulaceae). *Mol. Phylogenet. Evol.* 23:147–158.

- 1307 Zhisheng A., Kutzbach J.E., Prell W.L., Porter S.C. 2001. Evolution of Asian monsoons and  
1308 phased uplift of the Himalaya Tibetan plateau since Late Miocene times. *Nature*  
1309 411:62-66.
- 1310 Zinetti F., Dapporto L., Vovlas A., Chelazzi G., Bonelli S., Balletto E., Ciofi C. 2013. When  
1311 the rule becomes the exception. No evidence of gene flow between two *Zerynthia*  
1312 cryptic butterflies suggests the emergence of a new model group. *PLoS One* 8:e65746.
- 1313

14 **TABLES**

15 **Table 1.** Summary of diversification analyses. Evolutionary models are divided by whether they are used to test hypotheses in favor of the Red Queen or to  
 16 support the Court Jester. Abbreviations: MCC, maximum clade credibility; HTP, Himalaya and Tibetan Plateau.

| Type of birth-death                                                                | Evolutionary model | Methods used                                     | References                                                               | Data used                                                                                               | Settings                                                                                                                                 | Main results                                                                                                                                         |
|------------------------------------------------------------------------------------|--------------------|--------------------------------------------------|--------------------------------------------------------------------------|---------------------------------------------------------------------------------------------------------|------------------------------------------------------------------------------------------------------------------------------------------|------------------------------------------------------------------------------------------------------------------------------------------------------|
| Time-dependence (rates vary continuously as a function of time and across clades)  | Red Queen          | BAMM<br>RevBayes                                 | Rabosky et al. (2014)<br>Höhna et al. (2016a)                            | MCC tree of Parnassiinae                                                                                | Bayesian model to test whether speciation rates have varied over time and/or across lineages (exponential variation)                     | A single shift: increase of diversification near the crown of the genus <i>Parnassius</i>                                                            |
| Diversity-dependence (rates vary as a function of the number of species)           | Red Queen          | DDD<br>( <i>dd_ML</i> )                          | Etienne et al. (2012)                                                    | MCC tree of the clade and one of <i>Parnassius</i> (to test whether they reach their carrying capacity) | 5 models to test whether speciation declines with diversity and/or extinction increases with diversity                                   | Both Parnassiinae and <i>Parnassius</i> have not reached their carrying capacity, but show some degree of diversity dependence                       |
| Trait-dependence (rates vary as a function of a character state for a trait)       | Red Queen          | MuSSE<br>( <i>make.musse</i> )<br>RevBayes       | Maddison et al. (2007)<br>FitzJohn et al. (2009)<br>Höhna et al. (2016a) | 200 posterior trees + host plant preferences (four states)                                              | 36 models to test whether a character state impacted speciation and/or extinction and/or transition rates between host plants            | Support for independent speciation rates for each host-specialist clade; no significant differences for extinction and transition rates among clades |
| Episodic birth-death model (rates vary discretely as a function of time)           | Court Jester       | TreePar<br>( <i>bd.shifts.optim</i> )<br>CoMET   | Stadler (2011)<br>May et al. (2016)                                      | 200 posterior trees<br>MCC tree                                                                         | 4 models to test whether diversification rates and turnover episodically changed over time                                               | Significant diversification rate and turnover changes in the late Pliocene (3.2 Ma) and a possible mass extinction in the mid-Miocene (15 Ma)        |
| Trait-dependence (rates vary as a function of a character state for a trait)       | Court Jester       | GeoSSE<br>( <i>make.geosse</i> )<br>RevBayes     | Maddison et al. (2007)<br>Goldberg et al. (2011)<br>Höhna et al. (2016a) | 200 posterior trees + geographical occurrence (highland, lowland, or widespread)                        | 12 models to test whether a character state impacted speciation and/or extinction and/or transition rates between mountains and lowlands | High speciation in mountain, medium allopatric speciation and low speciation in lowland (no effect of the trait on extinction and transition rates)  |
| Environmental-dependence (rates vary as a function of a time-variable environment) | Court Jester       | RPANDA<br>( <i>fit_env</i> )<br>TESS<br>RevBayes | Condamine et al. (2013)<br>Höhna et al. (2016b)<br>Höhna (in prep.)      | 200 posterior trees + past global temperatures + past altitude of the HTP                               | 8 models for each variable to test whether rates vary with the paleoenvironment                                                          | Speciation and extinction are positively associated with warm climate. Speciation or extinction is not significantly associated with past altitude   |

17 **Table 2.** Results from episodic diversification analyses in TreePar with or without mass extinction. When  
 18 mass extinction is disallowed, the best-supported model has a single rate-shift, as determined by the lowest  
 19 AICc and  $\Delta$ AICc. When mass extinction is allowed, the best model also has a single mass-extinction event.  
 20 Adding more diversification shifts or mass extinctions did not significantly improve the likelihood of the  
 21 models. Abbreviations: BD, birth-death; ME, mass extinction; NP, number of parameters; logL, log-  
 22 likelihood; AICc, corrected Akaike Information Criterion;  $\Delta$ AICc, the difference in AICc between the  
 23 model with the lowest AICc and the others. Parameter estimates: r, net diversification rate (speciation minus  
 24 extinction);  $\epsilon$ , turnover (extinction over speciation); st, shift time; sp, survival probability at a mass  
 25 extinction event. ‘r1’ denotes the diversification rate and ‘ $\epsilon$ 1’ is the turnover, both inferred between Present  
 26 and the shift time 1 (‘st1’).

| Models       | Mass extinction events disallowed |                                                   |                          |                          | Mass extinction events allowed |                          |                                                   |                          |
|--------------|-----------------------------------|---------------------------------------------------|--------------------------|--------------------------|--------------------------------|--------------------------|---------------------------------------------------|--------------------------|
|              | BD with no shift time             | BD with 1 shift time                              | BD with 2 shift times    | BD with 3 shift times    | Models                         | BD with no ME            | BD with 1 ME                                      | BD with 2 MEs            |
| NP           | 2                                 | 5                                                 | 8                        | 11                       | NP                             | 2                        | 4                                                 | 6                        |
| logL         | -182.840<br>$\pm 0.5640$          | <b>-175.099</b><br><b><math>\pm 0.5727</math></b> | -172.910<br>$\pm 0.5716$ | -170.504<br>$\pm 0.5778$ | logL                           | -240.789<br>$\pm 0.5634$ | <b>-235.792</b><br><b><math>\pm 0.5667</math></b> | -234.082<br>$\pm 0.5760$ |
| AICc         | 369.827<br>$\pm 1.1281$           | <b>360.959</b><br><b><math>\pm 1.1454</math></b>  | 363.714<br>$\pm 1.1432$  | 366.624<br>$\pm 1.1555$  | AICc                           | 485.726<br>$\pm 1.1267$  | <b>482.345</b><br><b><math>\pm 1.1334</math></b>  | 486.058<br>$\pm 1.1520$  |
| $\Delta$ AIC | 8.868                             | <b>0</b>                                          | 2.755                    | 5.665                    | $\Delta$ AIC                   |                          |                                                   |                          |
| r1           | 0.0934<br>$\pm 0.0008$            | <b>0.1188</b><br><b><math>\pm 0.0057</math></b>   | 0.0915<br>$\pm 0.0067$   | 0.0711<br>$\pm 0.0105$   | r                              | 0.0930<br>$\pm 0.0008$   | <b>0.1672</b><br><b><math>\pm 0.0012</math></b>   | 0.1859<br>$\pm 0.0014$   |
| $\epsilon$ 1 | 0.5374<br>$\pm 0.0047$            | <b>0.1699</b><br><b><math>\pm 0.0355</math></b>   | 0.3109<br>$\pm 0.0411$   | 0.5288<br>$\pm 0.1224$   | $\epsilon$                     | 0.5363<br>$\pm 0.0042$   | <b>0.0279</b><br><b><math>\pm 0.0038</math></b>   | 0.0025<br>$\pm 0.0010$   |
| st1          | -                                 | <b>3.21</b><br><b><math>\pm 0.0573</math></b>     | 2.81<br>$\pm 0.0693$     | 2.56<br>$\pm 0.0788$     | st1                            | -                        | <b>14.82</b><br><b><math>\pm 0.12</math></b>      | 7.37<br>$\pm 0.17$       |
| r2           | -                                 | <b>0.0312</b><br><b><math>\pm 0.0007</math></b>   | 0.0254<br>$\pm 0.0166$   | 0.0031<br>$\pm 0.0295$   | sp1                            | -                        | <b>0.0749</b><br><b><math>\pm 0.0021</math></b>   | 0.466<br>$\pm 0.0144$    |
| $\epsilon$ 2 | -                                 | <b>0.9142</b><br><b><math>\pm 0.0052</math></b>   | 0.8319<br>$\pm 0.0529$   | 0.9179<br>$\pm 0.0795$   | st2                            | -                        | -                                                 | 16.08<br>$\pm 0.29$      |
| st2          | -                                 | -                                                 | 15.29<br>$\pm 0.8932$    | 10.47<br>$\pm 0.6951$    | sp2                            | -                        | -                                                 | 0.0759<br>$\pm 0.0028$   |
| r3           | -                                 | -                                                 | -0.3498<br>$\pm 0.1026$  | 0.0302<br>$\pm 0.0190$   |                                |                          |                                                   |                          |
| $\epsilon$ 3 | -                                 | -                                                 | 0.7616<br>$\pm 0.0380$   | 0.8461<br>$\pm 0.0506$   |                                |                          |                                                   |                          |
| st3          | -                                 | -                                                 | -                        | 20.29<br>$\pm 0.9277$    |                                |                          |                                                   |                          |
| r4           | -                                 | -                                                 | -                        | -0.9929<br>$\pm 0.1753$  |                                |                          |                                                   |                          |
| $\epsilon$ 4 | -                                 | -                                                 | -                        | 0.8571<br>$\pm 0.0403$   |                                |                          |                                                   |                          |

27

**Table 3.** Results from RPANDA analyses. The model with positive dependence of speciation and extinction on temperature has the lowest AICc and highest AIC $\omega$ . Macroevolutionary scenarios were compared in which speciation and extinction vary through time (Time), or by paleo-elevation changes of the Himalaya and Tibetan Plateau (Alti.), and global temperature changes (Temp.). Abbreviations: NP, number of parameters; logL, log-likelihood; AICc, corrected Akaike Information Criterion;  $\Delta$ AICc, the difference in AICc between the model with the lowest AICc and the others; AIC $\omega$ , Akaike weight. Parameter estimates:  $\lambda_0$  and  $\mu_0$ , speciation and extinction for environmental value at present;  $\alpha$  and  $\beta$ , parameter controlling variation of speciation ( $\alpha$ ) and extinction ( $\beta$ ) with paleoenvironment.

| Models                                                                         | NP       | logL                                             | AICc                                            | $\Delta$ AIC | AIC $\omega$ | $\lambda_0$                                     | $\alpha$                                        | $\mu_0$                                         | $\beta$                                         |
|--------------------------------------------------------------------------------|----------|--------------------------------------------------|-------------------------------------------------|--------------|--------------|-------------------------------------------------|-------------------------------------------------|-------------------------------------------------|-------------------------------------------------|
| Constant birth-death                                                           | 2        | -240.336<br>$\pm 0.620$                          | 484.819<br>$\pm 1.240$                          | 5.186        | 0.044        | 0.2048<br>$\pm 0.0018$                          | -                                               | 0.1123<br>$\pm 0.0017$                          | -                                               |
| $\lambda_{\text{Time}}$ and $\mu_{\text{constant}}$                            | 3        | -238.427<br>$\pm 0.624$                          | 483.151<br>$\pm 1.249$                          | 3.518        | 0.101        | 0.1962<br>$\pm 0.0016$                          | -0.0407<br>$\pm 0.0004$                         | 5.00E-08<br>$\pm 5.00E-08$                      | -                                               |
| $\lambda_{\text{constant}}$ and $\mu_{\text{Time}}$                            | 3        | -239.089<br>$\pm 0.621$                          | 484.474<br>$\pm 1.242$                          | 4.841        | 0.052        | 0.1914<br>$\pm 0.0016$                          | -                                               | 0.0549<br>$\pm 0.0010$                          | 0.0433<br>$\pm 0.0006$                          |
| $\lambda_{\text{Time}}$ and $\mu_{\text{Time}}$                                | 4        | -238.427<br>$\pm 0.624$                          | 485.354<br>$\pm 1.249$                          | 5.721        | 0.034        | 0.1962<br>$\pm 0.0016$                          | -0.0405<br>$\pm 0.00004$                        | 8.535E-05<br>$\pm 3.24E-05$                     | 0.0347<br>$\pm 0.0024$                          |
| $\lambda_{\text{Alti.}}$ and $\mu_{\text{constant}}$                           | 3        | -240.247<br>$\pm 0.572$                          | 486.790<br>$\pm 1.144$                          | 7.157        | 0.016        | 0.0310<br>$\pm 0.0012$                          | 0.0004<br>$\pm 6.35E-06$                        | 0.0794<br>$\pm 0.0021$                          | -                                               |
| $\lambda_{\text{constant}}$ and $\mu_{\text{Alti.}}$                           | 3        | -241.542<br>$\pm 0.577$                          | 489.379<br>$\pm 1.155$                          | 9.746        | 0.004        | 0.1991<br>$\pm 0.0017$                          | -                                               | 0.5116<br>$\pm 0.0676$                          | -0.00024<br>$\pm 1.35E-05$                      |
| $\lambda_{\text{Alti.}}$ and $\mu_{\text{Alti.}}$                              | 4        | -240.253<br>$\pm 0.582$                          | 489.005<br>$\pm 1.164$                          | 9.372        | 0.005        | 0.0454<br>$\pm 0.0021$                          | 0.0003<br>$\pm 9.30E-06$                        | 0.1016<br>$\pm 0.0058$                          | -2.67E-05<br>$\pm 6.29E-05$                     |
| $\lambda_{\text{Temp.}}$ and $\mu_{\text{constant}}$                           | 3        | -240.605<br>$\pm 0.632$                          | 487.505<br>$\pm 1.264$                          | 7.872        | 0.011        | 0.2121<br>$\pm 0.0021$                          | -0.0242<br>$\pm 0.0012$                         | 0.0834<br>$\pm 0.0011$                          | -                                               |
| $\lambda_{\text{constant}}$ and $\mu_{\text{Temp.}}$                           | 3        | -238.058<br>$\pm 0.649$                          | 482.412<br>$\pm 1.298$                          | 2.779        | 0.146        | 0.1817<br>$\pm 0.0013$                          | -                                               | 0.0071<br>$\pm 0.0005$                          | 0.4707<br>$\pm 0.0138$                          |
| <b><math>\lambda_{\text{Temp.}}</math> and <math>\mu_{\text{Temp.}}</math></b> | <b>4</b> | <b>-235.566</b><br><b><math>\pm 0.595</math></b> | <b>479.633</b><br><b><math>\pm 1.189</math></b> | <b>0</b>     | <b>0.586</b> | <b>0.0839</b><br><b><math>\pm 0.0017</math></b> | <b>0.3811</b><br><b><math>\pm 0.0073</math></b> | <b>0.0797</b><br><b><math>\pm 0.0019</math></b> | <b>0.3988</b><br><b><math>\pm 0.0041</math></b> |



**Table 4.** Results from the TESS analyses. a) Paleoenvironment-dependent diversification models. b) Episodic birth-death models. The model with positive dependence of speciation and extinction with temperature has the lowest AICc and highest AIC $\omega$ . We compared macroevolutionary scenarios in which speciation and extinction vary through time (Time), or according to paleo-elevation changes of the Himalaya and Tibetan Plateau (Alti.), according to global temperature changes (Temp.), and episodic birth-death models (Shift). Abbreviations: NP, number of parameters; logL, log-likelihood; AICc, corrected Akaike Information Criterion;  $\Delta$ AICc, the difference in AICc between the model with the lowest AICc and the others; AIC $\omega$ , Akaike weight. Parameter estimates:  $\lambda_0$  and  $\mu_0$ , speciation and extinction for the environmental value at present;  $\alpha$  and  $\beta$ , parameter controlling the variation of the speciation ( $\alpha$ ) and extinction ( $\beta$ ) with the paleoenvironment.  $\lambda_1$  and  $\mu_1$ , speciation and extinction for the first period of time (present to first shift).

a)

| Models                                               | NP       | logL            | AICc           | $\Delta$ AIC | AIC $\omega$ | $\lambda_0$   | $\alpha$      | $\mu_0$       | $\beta$       |
|------------------------------------------------------|----------|-----------------|----------------|--------------|--------------|---------------|---------------|---------------|---------------|
| Constant birth-death                                 | 2        | -240.687        | 485.425        | 3.668        | 0.044        | 0.2037        | -             | 0.1113        | -             |
| $\lambda_{\text{Time}}$ and $\mu_{\text{constant}}$  | 3        | -238.811        | 483.775        | 2.018        | 0.101        | 0.1951        | -0.0402       | 2.01E-06      | -             |
| $\lambda_{\text{constant}}$ and $\mu_{\text{Time}}$  | 3        | -239.331        | 484.816        | 3.059        | 0.060        | 0.1898        | -             | 0.0515        | 0.0467        |
| $\lambda_{\text{Time}}$ and $\mu_{\text{Time}}$      | 4        | -238.802        | 485.916        | 4.159        | 0.035        | 0.1951        | -0.0398       | 0.0002        | 0.0330        |
| $\lambda_{\text{Alti.}}$ and $\mu_{\text{constant}}$ | 3        | -239.570        | 485.294        | 3.537        | 0.047        | 0.0483        | 0.0003        | 0.09450       | -             |
| $\lambda_{\text{constant}}$ and $\mu_{\text{Alti.}}$ | 3        | -240.416        | 486.985        | 5.228        | 0.020        | 0.1999        | -             | 0.3730        | -0.00014      |
| $\lambda_{\text{Alti.}}$ and $\mu_{\text{Alti.}}$    | 4        | -239.378        | 487.067        | 5.310        | 0.019        | 0.0472        | 0.0004        | 0.1169        | 0.0002        |
| $\lambda_{\text{Temp.}}$ and $\mu_{\text{constant}}$ | 3        | -239.570        | 485.294        | 3.537        | 0.047        | 0.0483        | 0.0003        | 0.0945        | -             |
| $\lambda_{\text{constant}}$ and $\mu_{\text{Temp.}}$ | 3        | -237.826        | 481.806        | 0.049        | 0.271        | 0.1800        | -             | 0.0064        | 0.5007        |
| $\lambda_{\text{Temp.}}$ and $\mu_{\text{Temp.}}$    | <b>4</b> | <b>-236.723</b> | <b>481.757</b> | <b>0</b>     | <b>0.278</b> | <b>0.1383</b> | <b>0.1463</b> | <b>0.0458</b> | <b>0.3483</b> |

48 **b)**

| <b>Models</b> | <b>NP</b> | <b>logL</b> | <b>AICc</b> | <b>ΔAIC</b> | <b>AIC<sub>w</sub></b> | $\lambda_1$ | $\lambda_2$ | $\lambda_3$ | $\lambda_4$ | $\lambda_5$ | $\lambda_6$ | $\mu_1$ | $\mu_2$ | $\mu_3$ | $\mu_4$ | $\mu_5$ | $\mu_6$ |
|---------------|-----------|-------------|-------------|-------------|------------------------|-------------|-------------|-------------|-------------|-------------|-------------|---------|---------|---------|---------|---------|---------|
| Shift 1       | 5         | -237.008    | 484.542     | 2.785       | 0.069                  | 0.052       | 0.176       | -           | -           | -           | -           | 0.004   | 0.018   | -       | -       | -       | -       |
| Shift 2       | 8         | -236.086    | 489.706     | 7.949       | 0.005                  | 0.195       | 0.084       | 0.180       | -           | -           | -           | 0.112   | 0.097   | 0.004   | -       | -       | -       |
| Shift 3       | 11        | -236.118    | 497.379     | 15.622      | 0.0001                 | 0.180       | 0.127       | 0.155       | 0.181       | -           | -           | 0.111   | 0.051   | 0.159   | 0.002   | -       | -       |
| Shift 4       | 14        | -234.251    | 501.935     | 20.178      | 0                      | 0.164       | 0.159       | 0.049       | 0.161       | 0.190       | -           | 0.136   | 0.062   | 0.074   | 0.058   | 0.008   | -       |

49

50

1351 **APPENDICES**

1352 **Appendix 1.** All sequence data used for this study (a file is generated per gene).

1353 **Appendix 2.** The individual gene alignments as recovered by MAFFT. Results of the  
1354 Bayesian phylogenetic analyses for each gene, and an explanation of the results.

1355 **Appendix 3.** The total-evidence matrix (including molecular and morphological data) used  
1356 for the phylogenetic placement of fossils with MrBayes.

1357 **Appendix 4.** The BEAST files for the Bayesian dating analyses (the tree prior can be a Yule  
1358 process or a birth-death model, and the dataset can include or not the morphological data).

1359 **Appendix 5.** The current geographic species distribution data of all Parnassiinae as coded  
1360 present (1) or absent (0) in all ten geographic areas (Western Palearctic, North Africa, Turkey,  
1361 Central Asia, Himalaya, India, Mongolia, Siberia, China-Japan, and Western Nearctic).

1362 **Appendix 6.** The time-stratified biogeographic model used for DEC analyses (time slices  
1363 represent geological epochs or stages in the Cenozoic).

1364 **Appendix 7.** Paleo-elevation for the Himalayan and Tibetan compiled from the literature.

1365 **Appendix 8.** Description of the Bayesian episodic environment-dependent birth-death model.

1366 **Appendix 9.** Results of PartitionFinder performed on the concatenated molecular dataset.

1367 **Appendix 10.** Time-calibrated trees of Parnassiinae as estimated by BEAST following four  
1368 different analyses.

1369 **Appendix 11.** Results of the model comparison for the dating analyses based on marginal  
1370 likelihood estimates and Bayes factors.

1371 **Appendix 12.** Biogeographic history of Parnassiinae as estimated by DEC.

1372 **Appendix 13.** Results from the diversity-dependence diversification analyses in DDD.

1373 **Appendix 14.** Results of the MuSSE and GeoSSE analyses performed on 200 trees randomly  
1374 taken from the Bayesian dating analysis. Models are ranked by AICc.

1375 **Appendix 15.** Plot of the difference between speciation rates between all traits. When the  
1376 difference overlaps zero (vertical red bar), the speciation rates are not significantly different.

1377 **Appendix 16.** Robustness of the SSE models with simulation tests, HiSSE analyses and an  
1378 implementation in RevBayes. For the simulation, the difference of fit between the best model  
1379 and the reference model is shown with the red vertical line for real data, and in black for  
1380 simulated data. HiSSE and RevBayes agree with the MuSSE models on host plants.

1381 **Appendix 17.** Summary of diversification models in BAMM compared across a gradient of  
1382 values for the Poisson process governing the number of rate shifts.

1383 **Appendix 18.** Credible set of configuration shifts inferred with BAMM and five different  
1384 values of the Poisson prior. It shows the distinct shift configurations with the highest posterior  
1385 probability. For each shift configuration, the locations of rate shifts are shown as black  
1386 circles, with circle size proportional to the marginal probability of the shift.

1387 **Appendix 19.** Rate-through-time plot as inferred with RevBayes for Parnassiinae. Net  
1388 diversification rates significantly changed and increased along the stem of the genus  
1389 *Parnassius*, in agreement with the rates as estimated with BAMM.

1390 **Appendix 20.** Rate-through-time plot as inferred with CoMET for Parnassiinae. The analyses  
1391 detected one possible mass extinction around 15 Ma and one speciation rate shift around 3.5  
1392 Ma, in agreement with two TreePar analyses allowing or not the mass extinction.

1393 **Appendix 21.** Credibility intervals of the correlation parameters for the Bayesian (RevBayes)  
1394 environment-dependent diversification models.

1395 **Appendix 22.** Correlation (linear regression) between speciation rates as inferred with  
1396 MuSSE (a) and BAMM (b) and the species richness of host plants on which each parnassiine  
1397 clade is feeding. In both cases, a strong and positive correlation is found.
